1 **Original Manuscript**

2 **Efficient CRISPR/Cas9-based genome editing and its application to conditional**  
 3 **genetic analysis in *Marchantia polymorpha***

4 Shigeo S. Sugano<sup>1,2</sup>, Ryuichi Nishihama<sup>3</sup>, Makoto Shirakawa<sup>3</sup>, Junpei Takagi<sup>4</sup>,  
 5 Yoriko Matsuda<sup>3</sup>, Sakiko Ishida<sup>3</sup>, Tomoo Shimada<sup>4</sup>, Ikuko Hara-Nishimura<sup>4</sup>, Keishi  
 6 Osakabe<sup>5</sup>, Takayuki Kohchi<sup>3,\*</sup>

7

8 1 R-GIRO, Ritsumeikan University, Noji-Higashi 1-1-1, Kusatsu, Shiga, Japan

9 2 JST, PRESTO, 4-1-8 Honcho, Kawaguchi, Saitama, Japan

10 3 Graduate School of Biostudies, Kyoto University, Kitashirakawa-Oiwake-cho,  
 11 Kyoto, Japan

12 4 Graduate School of Science, Kyoto University, Kitashirakawa-Oiwake-cho, Kyoto,  
 13 Japan

14 5 Faculty of Bioscience and Bioindustry, Tokushima University, 2-1 Josanjima,  
 15 Tokushima, Tokushima, Japan

16

17 \* [tkohchi@lif.kyoto-u.ac.jp](mailto:tkohchi@lif.kyoto-u.ac.jp)

18

## Abstract

*Marchantia polymorpha* is one of the model species of basal land plants. Although CRISPR/Cas9-based genome editing has already been demonstrated for this plant, the efficiency was too low to apply to functional analysis. In this study, we show the establishment of CRISPR/Cas9 genome editing vectors with high efficiency for both construction and genome editing. Codon optimization of Cas9 to Arabidopsis achieved over 70% genome editing efficiency at two loci tested. Systematic assessment revealed that guide sequences of 17 nt or shorter dramatically decreased this efficiency. We also demonstrated that a combinatorial use of this system and a floxed complementation construct enabled conditional analysis of a nearly essential gene. This study reports that simple, rapid, and efficient genome editing is feasible with the series of developed vectors.

*Abbreviations:* *ARF1*, *AUXIN RESPONSE FACTOR1*; Cas9, CRISPR-associated endonuclease 9; CRISPR, clustered regularly interspaced short palindromic repeats; DSB, double-strand break; *EF*, *ELONGATION FACTOR1a*; *HPT*, hygromycin phosphotransferase; gRNA, single guide RNA; NAA, 1-naphthalene acetic acid; NHEJ, non-homologous end joining; NLS, nuclear localization signal; *NOPI*, *NOPPERABOI*; *mALS*, mutated acetolactate synthase; MMEJ, microhomology-mediated end joining; PAM, protospacer adjacent motif; PCR, polymerase chain reaction; RT-PCR, reverse transcription polymerase chain reaction.

## Introduction

The clustered regularly interspaced short palindromic repeats (CRISPR)/ CRISPR-associated endonuclease 9 (Cas9)-based genome editing system is a groundbreaking technology in molecular genetics, which enables alterations of target sequences in the genome [1, 2]. The system consists of two components: a Cas9 protein, which has an RNA-guided endonuclease activity, and a single guide RNA (gRNA), which specifies a target sequence within the genome. The Cas9 protein from *Streptococcus pyogenes* binds to the DNA sequence “NGG,” which is known as the protospacer adjacent motif (PAM) sequence. The interaction between a Cas9 protein and a PAM sequence induces the interaction between a gRNA and its target DNA sequence. If a sufficient length of the gRNA matches with the target sequence, the nuclease domains of Cas9 become capable of cutting the phosphodiester bonds on both sides of the strands, which are located 3 bp upstream of the PAM sequence [3]. Once a double-strand break (DSB) occurs, the error-prone non-homologous end joining (NHEJ) repair pathway is activated and sometimes introduces indels or base substitutions randomly at the target site, which could result in disruption of the target locus with various alleles.

This simple CRISPR/Cas9 system has been reconstructed in a wide range of eukaryotes, and researchers are now able to use molecular genetics in the species that are suitable for the purposes of their specific biological research [4]. Previous studies demonstrated that the CRISPR/Cas9 system works in a variety of plant species, from algae to crops [5-7], which has greatly changed functional genetics in basic and applied plant research. Recent studies on the moss *Physcomitrella patens* [8, 9] and the green alga *Chlamydomonas reinhardtii* [10, 11] reported highly efficient genome editing methods using CRISPR-based genome editing. Compared to flowering plants,

such haploid generation-dominant plant species are free from the transheterozygosity issues associated with diploidy or polyploidy [12-14], allowing isolation of pure mutant lines for analysis with relative ease. In the meanwhile, regardless of the ploidy, but especially for haploid species, genome editing techniques cannot be simply applied to essential genes as this leads to lethality; conditional approaches are required.

The liverwort *Marchantia polymorpha* is an emerging model species of land plants for studying plant evolution and gene function [15]. *M. polymorpha* has good features for the application of reverse genetics. Most vascular plants and mosses are known to have experienced two or more whole genome duplication events, which makes it difficult to analyze gene functions due to the presence of paralogous genes. Sequencing of the *M. polymorpha* genome revealed no sign of a whole genome duplication and accordingly there is low genetic redundancy in most regulatory genes, such as transcription factors and signaling components [16]. In addition, non-chimeric individuals can be easily obtained and propagated via gemmae that are derived from single cells by asexual reproduction in *M. polymorpha* [17], which accelerates transgenic experiments [18]. A variety of tools for molecular genetic experiments have been developed for *M. polymorpha* [18], such as high-efficiency transformation methods [19-21], a homologous recombination-mediated gene targeting method [22], a systematic set of vectors [18], and a conditional gene expression/deletion system [23].

Recently, a transcription activator-like effector nuclease (TALEN)-based genome editing technology was established in *M. polymorpha* [24]. We have previously demonstrated that a CRISPR/Cas9-based knockout system, which exploited human-codon-optimized Cas9, can operate in *M. polymorpha* [25].

However, the efficiency of genome editing was so low that the identification of plants with a mutation at the target locus required selection by a phenotype attributed to the mutation. Systematic optimization of Cas9 and gRNAs with rice, tobacco, and Arabidopsis showed that their expression levels greatly affected genome editing efficiencies [26, 27], suggesting that there is room to improve genome editing efficiencies in *M. polymorpha*.

Here, we report remarkable improvement in genome editing efficiency using Arabidopsis-codon-optimized (Atco) Cas9 to a degree that simple direct sequencing analysis of few number of transformants is sufficient to obtain genome-edited plants. In this efficient genome editing system, we assessed off-target effects and evaluated the influence of gRNAs length. Occurrence of large deletions using two gRNAs was also demonstrated. In addition, we provide a simple CRISPR/Cas9-based method to generate conditional knockout mutants. Our improved CRISPR/Cas9-based genome editing system can be used as a powerful molecular genetic tool in *M. polymorpha*.

## Materials and Methods

### Accessions, growth conditions and transformation of *M. polymorpha*

*M. polymorpha* Takaragaike-1 (Tak-1, male accession) and Takaragaike-2 (Tak-2, female accession) were used as wild types [19]. F1 spores were generated as previously described [25]. *M. polymorpha* was cultured axenically under 50–60  $\mu\text{mol m}^{-2} \text{sec}^{-1}$  continuous white light at 22 °C. *Agrobacterium*-mediated transformation of F1 sporelings was performed as described previously [19]. Transformants were selected on half-strength B5 medium [28] containing 1% agar with 0.5  $\mu\text{M}$  chlorsulfuron (kindly provided by DuPont; in case of the assay in Fig. 6, Wako Pure

Chemical Industries) or 10 mg L<sup>-1</sup> hygromycin (Wako Pure Chemical Industries) depending on the transformation vector.

# **Vector construction**

All the DNA sequences of the vectors were deposited to DDBJ and Addgene: pMpGE\_En01(LC090754; 71534), pMpGE\_En03 (LC090755; 71535), pMpGE010 (LC090756; 71536), pMpGE011 (LC090757; 71537), pMpGE006 (LC375817; 108722), pMpGE013 (LC375815; 108681), pMpGE014 (LC375816; 108682), pMpGWB337tdTN (LC375949; 108717), pMpGWB337Cit (LC375950; 108718), pMpGWB337tdT (LC375951; 108719), pMpGWB337TR (LC375952; 108720), pMpGWB337mT (LC375953; 108721). The construction of these vectors was performed as follows:

-pMpGE010, pMpGE011. Firstly, a DNA fragment of nuclear localization signal (NLS)-tagged *Atco-Cas9* with the *Pisum sativum rbcS3A* terminator (Pea3ter) was PCR amplified with the primers cacc\_AtCas9\_F and Pea3Ter\_R using the pDe-CAS9 vector [12] as a template and subcloned into pENTR/D-TOPO (Invitrogen). Using the entry clone and LR Clonase II (Invitrogen), LR reactions with pMpGWB103 [29] and pMpGWB303 [29] were conducted to express Cas9 under the *M. polymorpha ELONGATION FACTOR1*  $\alpha$  promoter (MpEF<sub>pro</sub>) [18]. The LR reaction product using pMpGWB103 was designated pMpGE006 and used for the two vector system experiments (Fig. 1A). Next, a Gateway attR1-attR2 cassette amplified from pMpGWB303 using the primers Infusion\_GW\_A51\_F and Infusion\_GW\_A51\_R was subcloned into the AorHI51 restriction enzyme site of the vectors produced by the LR reaction above to produce pMpGE010 and pMpGE011.

-pMpGE\_En01. The 2 kbp promoter region of *MpU6-1* was amplified from pENTR D-TOPO/*MpU6-1*pro:gRNA\_ARF1 [25] using the primers Mp-U6\_38003\_F and Mp-U6\_38003\_R. The CmR-ccdB-gRNA fragment with SacI and PstI sites was also amplified from pENTR D-TOPO/AtU6pro:CmR-ccdB-gRNA (unpublished data) using the primers OE-MpU6-CmRccdB-F2 and gRNA-R3. These two amplified fragments were combined using overlap extension PCR and the combined fragment was cloned into pENTR/D-TOPO vector to produce pMpGE\_En01.

-pMpGE\_En02. PCR was conducted using pMpGE\_En01 as a template and with the primers BsaI-Sp-sgRNA\_F and gRNA\_R to amplify a gRNA backbone fragment. Additionally, a 500 bp region of the *MpU6-1* promoter was PCR-amplified using the MpU6-1\_500\_F and BsaI\_MpU6\_1R primers and plasmid pMpGE\_En01 as a template. Amplified gRNA and *MpU6-1* promoter fragments were conjugated by overlap extension PCR and cloned into pENTR/D-TOPO to produce pMpGE\_En02.

-MpGE\_En03. pMpGE\_En02 was digested by BsaI. Two oligo DNAs, Mp\_oligo6BsaI\_Gf and Mp\_oligo6BsaI\_Gr, were annealed and cloned into BsaI-digested pMpGE\_En02 to produce the pMpGE\_En03 plasmid (see Fig. S1).

-pMpGE013 and pMpGE014 vectors. Briefly, annealed oligos harboring AarI recognition sites (Mp\_oligo5AarI\_Gf and Mp\_oligo5AarI\_Gr) were subjected to ligation reactions with the pMpGE\_En02 vector linearized with BsaI. The resulting vector was subjected to LR reaction with pMpGE010 and pMpGE011 to produce pMpGE013 and pMpGE014, respectively.

-pMpGE vectors harboring *ARF1\_1*, *NOP1\_1*, and *NOP1\_2* gRNA. pMpGWB301, harboring ARF1\_1 gRNA, was the same construct as in the previous report [25]. Construction of other vectors was by the methods described in Fig. S1. Briefly, annealed oligos of ARF1\_1 and NOP1\_1 for pMpGE\_En01 were subjected to the In-

164 Fusion™ HD Cloning Kit (TaKaRa) to the pMpGE\_En01 vector linearized with PstI  
165 and SacI (TaKaRa). Conversely, annealed oligos of NOP1\_2 gRNAs were subjected  
166 to ligation reactions with pMpGE\_En03 linearized with BsaI (NEB). These constructs  
167 were subjected to the LR reaction to be introduced into pMpGE010 or pMpGE011.  
168 Oligos for gRNAs are listed in Supplemental Table S1.  
169 -pMpGWB337 series. The plasmid pMp301-EFp:loxGW:Tlox:CitNLS:T<sup>18</sup>) was  
170 digested with SalI and SacI and ligated with a SalI-SacI fragment containing an NruI  
171 site, which was generated by PCR using pMp301-EFp:loxGW:Tlox:CitNLS:T as  
172 template with the primer set ccdB\_236F and loxP\_NruI\_Sac\_R and subsequent  
173 enzyme digestion, to generate pMp301-EFp:loxGW:Tlox-NruI. Coding sequences of  
174 various fluorescent proteins were PCR amplified using a common reverse primer  
175 (NOST\_head\_R\_SacI) and the following forward primers and templates: TagRFP  
176 (TagRFP\_CAGC\_F; pMpGWB126 [29]), tdTomato (tdTomato\_CAGC\_F;  
177 pMpGWB129 [29]), tdTomato-NLS (tdTomato\_CAGC\_F; pMpGWB116 [29]),  
178 Atco-mTurquoise2 (mTurq\_CAGC\_F, pUGW2-mTurq2 [see below]), and Citrine  
179 (ccdB\_236F, pMpGWB337 [23]). These amplified fragments (except for Citrine)  
180 were digested with SacI and ligated with NruI/SacI-digested pMp301-  
181 EFp:loxGW:Tlox-NruI to generate a pMp301-EFp:loxGW:Tlox:FP:T series (FP: TR  
182 for TagRFP; tdT for tdTomato; tdTN for tdTomato-NLS; mT for mTurquoise2). For  
183 Citrine, the amplified fragment was digested with SalI and SacI and ligated with  
184 SalI/SacI-digested pMp301-EFp:loxGW:Tlox:CitNLS:T to generate pMp301-  
185 EFp:loxGW:Tlox:Cit:T. A fragment consisting of the *MpHSP17.8A1* promoter, the  
186 Cre-GR coding sequence, and the NOS terminator was amplified and cloned into the  
187 AscI site of the pMp301-EFp:loxGW:Tlox:FP:T series, as described previously [29],  
188 to generate a series of pMpGWB337-FP vectors (Fig. S7). For construction of



pUGW2-mTurq2, an Atco-mTurquoise2 DNA fragment, which was synthesized and amplified by PCR with the primer set pUGW\_Aor\_mTurq\_IF\_F and pUGW\_Aor\_mTurq\_Stp\_IF\_R, was cloned into the unique Aor51HI site of pUGW2 [30] using the In-Fusion Cloning Kit. The primers used are listed in Supplementary Table S1.

### **Mutation analyses in on-target and off-target sites**

Transformed sporelings were selected with antibiotics for 18 days, and selected lines, referred to as T1 plants, were transferred to fresh medium with the same antibiotics for approximately 2 weeks. The genomic DNAs of T1 thalli were extracted. The *MpARF1* target locus was PCR amplified using the primers ARF1\_Seq\_F3 and ARF1\_Seq\_R3 and subjected to direct sequencing. The *MpNOP1* target locus was PCR amplified using the primers CRISPR\_NOP1\_F and CRISPR\_NOP1\_R then subjected to direct sequencing. Using genomic DNAs harboring mutations in the on-target sites of ARF1\_1 or NOP1\_1, corresponding off-target sites were PCR amplified using the primers listed in Supplementary Table S1, and subjected to direct sequencing. Off-target sites of ARF1\_1 and NOP1\_1 were searched using the *M. polymorpha* genome ver3.1 [16] and CasOT software [31].

### **Assessment of gRNA guide lengths**

pMpGE010\_NOP1\_2 variants harboring various lengths of gRNAs were constructed using pMpGE\_En02. For the addition of an “extra initial G,” the pMpGE\_En03 vector was used (oligos are listed in Supplementary Table S1). T1 plants in petri dishes were placed onto a white-light-emitting display (iPad, Apple) and photos of the whole body of T1 plants were taken by a digital camera (EOS KissX3). Digital

images of T1 plants were analysed by ImageJ. Using Threshold Colour program, ratio of transparent area to whole plant were measured. The images were classified into three types; Class I: over 90% of the thallus area was transparent; Class II: less than 90% and over 20% transparent area; and Class III: less than 20% transparent.

### **Analysis of *de novo* mutations**

Three pMpGE010\_NOP1\_1 transformants that had transparent (mutant) and non-transparent (wild-type) sectors in one individual were cultured. Four gemmae from a gemma cup formed on each of the two sectors were transplanted to new media and cultured to conduct genome analysis.

### **Large deletion induction by co-transformation**

pMpGE013 and pMpGE014 were digested by the AarI restriction enzyme. Annealed oligos for NOP1\_3 to NOP1\_6 (their sequences are described in Supplemental Table S1) were ligated into the linearized vectors. Vectors were introduced into regenerating thalli via *Agrobacterium* [20]. T1 transformants selected by appropriate antibiotics were cultured at for least 2 weeks and subjected to DNA extraction. The extracted DNAs from T1 thalli were analyzed by PCR using the appropriate primers described in Supplementary Table S1. The PCR products were analyzed by direct sequencing to examine genome-editing events.

### **Generation of conditional knockout mutants.**

Annealed oligos for an MpMPK1-targeting gRNA (sgRNA\_Bsa\_MpMPK1\_ex1t\_F and -R) were ligated into BsaI-digested pMpGE\_En02. The resulting plasmid was subjected to LR reaction with pMpGE010 to generate pMpGE010-MPK1ex1t.

MpMPK1 cDNA was amplified by RT-PCR using RNA from Tak-1 and the primer set MpMPK1\_1F\_TOPO and MpMPK1\_c1131R\_STP and cloned into pENTR/D-TOPO. The resulting entry vector was subjected to LR reaction with pMpGWB337 and pMpGWB337tdTN to generate pMpGWB337-cMPK1 and pMpGWB337tdTN-cMPK1, respectively [19]. Sporelings were transformed with pMpGE010-MPK1ex1t alone or together with pMpGWB337-cMPK1 or pMpGWB337tdTN-cMPK1 using the *Agrobacterium*-based method. T1 transformants selected by hygromycin only or by hygromycin and chlorsulfuron together, respectively, were genotyped by PCR with the primer set MpMPK1\_-549F and MpMPK1\_g540R, and the amplified fragments were directly sequenced. G1 gemmae of the pMpGWB337tdTN-cMPK1-harboring genome-edited lines were further confirmed to have the same mutations as those in the respective parental T1 lines. G2 gemmae of line #4 were planted on a 9-cm plastic plate containing half-strength B5 medium with 1  $\mu$ M dexamethasone (DEX) and further treated with a drop of 1  $\mu$ M DEX. The plate was incubated in a 37°C air incubator for 80 min and then moved to a 22°C growth room. In 24 h, the same procedures were repeated, and the plate was incubated in the 22°C growth room for 13 days. Observation of tdTomato fluorescence was performed using a stereoscope (M205C, Leica) with the Ds-Red2 filter set (Leica). Induction of cDNA deletion was examined by genomic PCR using the primer sets 1 (MpEF-P\_seqL1 and MpMPK1\_c1131R\_STP), 2 (MpEF-P\_seqL1 and tdTomato\_753R), and 3 (MpMPK1\_-549F and MpMPK1\_g1010R). The primers used are listed in Supplementary Table S1.

## Results

## Improved genome editing efficiency in *M. polymorpha* by using Arabidopsis codon optimized Cas9

In the previous report, we co-introduced a construct for gRNA expression with a 2 kbp MpU6-1 promoter and another for the expression of human-codon-optimized Cas9-NLS (*hCas9-NLS*) to reconstruct a CRISPR/Cas9 system in *M. polymorpha*, and succeeded in obtaining plants whose target locus was edited [25]. However, the genome editing efficiency was very low, under 0.5%; that is, only a few plants with genome editing events were obtained for each co-transformation of sporelings derived from two sporangia. To improve the genome editing efficiency to a practical level, we examined the effects of codon optimization by replacing *hCas9-NLS* with *Atco-Cas9-NLS* (although the 35S terminator was also replaced by the *Pisum sativum rbcS3A* terminator [12], this difference seems negligible (unpublished data)). In this new Cas9 expression plasmid, designated pMpGE006, *Atco-Cas9* was driven by the constitutive MpEF<sub>pro</sub> promoter, which is preferentially expressed in meristematic tissues in *M. polymorpha* (Fig. 1A) [32]. For the expression of a gRNA, the same gRNA expression vector used in the previous study was again utilized [25].

To evaluate genome-editing efficiencies, we firstly chose the MpARF1 (*AUXIN RESPONSE FACTOR1*) transcription factor as a target, which had been used in the previous report [25, 33]. Since Mparf1 mutants are known to show an NAA resistant phenotype [34, 35], auxin-resistant T1 transformants with mutations in the MpARF1 locus can be positively selected. The gRNA expression plasmid for MpARF1, pMpGWB301\_ARF1\_1, which had previously been proved to be effective [25], was also used in this experiment (Figs. 1A, S2). A single co-transformation of sporelings with pMpGE006 and pMpGWB301\_ARF1\_1 yielded hundreds of NAA-resistant plants (Figs. 1B, S3), whereas the same experiment with the *hCas9* plasmid,

instead of pMpGE006, yielded few NAA-resistant lines (Fig. S3). We analyzed the target sequence of *MpARF1* in 16 NAA-resistant T1 co-transformants of pMpGE006 and pMpGWB301\_ARF1\_1 by direct sequencing, all of which harbored indels and/or base substitutions in the target site (Fig. 1C). Therefore, we conclude that the Atco-Cas9 product has much higher efficiency than hCas9.

Next, we examined whether mutants could be isolated without the NAA-based phenotypic selection. T1 co-transformants were selected only by using hygromycin and chlorsulfuron, which are selection markers for pMpGE006 and pMpGWB301\_ARF1\_1, respectively. Direct sequencing analyses showed that 75% of the randomly selected T1 plants (12 of 16) had some mutations in the target sequence of *MpARF1* (Fig. 1D, E). Although one plant showed a mosaic sequence pattern (Fig. 1D, E), the majority was non-mosaic, suggesting that the genome editing events had occurred in an early phase of transformation. From these data, we concluded that the efficiency of genome editing using the Atco-Cas9 expression cassette is high enough to isolate mutants by direct sequencing analysis of target genes without any target-gene-dependent phenotypic selections.

### **Construction of genome editing vector series in *M. polymorpha***

In addition to pMpGE006, we constructed a series of genome editing vectors for addressing the necessity of various applications of genome editing. We constructed a single binary vector system with both gRNA and Cas9 expression cassettes to make more easy-to-handle vectors (Fig. 2). pMpGE010 and pMpGE011 are based on the Gateway cloning system (Fig. 2A). The entry clone vector harbors gRNA expression cassettes in pENTR/D-TOPO, designated as pMpGE\_En01 to pMpGE\_En03 (Fig. 2A). pMpGE\_En01 contains a 2 kbp *MpU6-1<sub>pro</sub>* for gRNA expression and the cloning

site for double stranded oligos with a guide sequence using the In-Fusion reaction (Fig. S1A). pMpGE\_En02 contains a 500 bp *MpU6-I<sub>pro</sub>* sequence for gRNA expression and is designed for restriction enzyme-based cloning (Fig. S1B). This vector does not contain a purine nucleotide at the 5' end of the gRNA cloning site, which is used to start transcription by RNA polymerase III [36]. pMpGE\_En03 is identical to pMpGE\_En02 except for a built-in “extra initial G” (Figs. 2A, S1B). The “extra initial G” also exists in pMpGE\_En01 (Fig. S1A). For binary vectors, pMpGE010 was constructed using pMpGWB103 [18] as a backbone vector, which harbors a hygromycin resistance cassette. Likewise, pMpGE011 was constructed using pMpGWB303, which harbors a chlorsulfuron resistance cassette.

For easier construction, binary vectors based on restriction-enzyme-based cloning, pMpGE013 and pMpGE014, were also constructed using pMpGE010 and pMpGE011 as backbones, respectively. Double stranded oligos harboring the target sequence of gRNAs can be directly cloned into pMpGE013 and pMpGE014, which contain the “extra initial G,” at the AarI restriction enzyme sites (Fig. 2B). These vectors provide a low-cost alternative for gRNA cloning.

### **Evaluation of the efficiency of genome editing vectors**

To evaluate genome-editing efficiencies in the new system, we exploited targeted mutagenesis at two loci (Fig. 3). We cloned into pMpGE\_En01 a gRNA harboring a guide sequence identical to that of pMpGWB301\_ARF1\_1 and transferred it to pMpGE010 (Fig. S2). The constructed vector was used for transformation of sporelings and the transformants were selected with hygromycin only on auxin-free media. Direct sequencing of the ARF1\_1 gRNA target site revealed that 75% of T1 plants (24 of 32) had mutations at the target site (Fig. 3A, B). A similar result was

obtained with pMpGE011 (Fig. S4A). Thus, the efficiency of targeted mutagenesis with the single vector system was comparable to that with the double vector system.

To examine whether genome editing could be applied at other loci, we chose a gene, *NOPPERABO1* (Mp*NOP1*), which encodes a plant U-box E3 ubiquitin ligase that is responsible for air-chamber formation in *M. polymorpha* [37]. Since Mp*nop1* mutants form transparent thalli due to the lack of air chambers, they can be easily distinguished from wild-type plants with the naked eye. An Mp*NOP1*-targeting gRNA, NOP1\_1 (Fig. S2), was introduced into sporelings with pMpGE010. Direct sequencing analysis revealed that 87.5% of T1 plants (28 of 32) had some mutation in the target sequence (Fig. 3C, D). Many of the mutant lines exhibited the transparent phenotype in the entire body, reflecting the frequency of non-mosaic sequence reads (Fig. 3E).

We also assessed a shorter (0.5 kbp) Mp*U6-1* promoter by comparing pMpGE\_En01 and pMpGE\_En02. Genome-editing efficiency with pMpGE\_En02 was comparable to that with pMpGE\_En01, when examined with the gRNA NOP1\_1 (Fig. S4B). This result suggests that the 0.5 kbp Mp*U6-1* promoter is sufficient to drive gRNA expression for efficient genome editing.

### **Influence of gRNA lengths to genome editing efficiency**

Next, we assessed the length of the gRNA guide sequence. It has previously been reported that truncated gRNA guide sequences (17 nt and 18 nt) show low off-target activities in mammalian cells [38]. We chose a guide sequence (5'-CAAACCGGAATGAGTCAGCT-3'), which targets the exon of the Mp*NOP1* gene (NOP1\_2; Fig. S2) and cloned various lengths (20 nt, 18 nt, 17 nt, and 16 nt) of the sequence into pMpGE\_En02, which does not have the “extra initial G.” Genome-

editing efficiencies were scored by classifying the penetrance of the transparent phenotype due to mutations in the *MpNOP1* gene: class I, plants with the transparent phenotype observed throughout; class II, plants with the transparent phenotype observed in a mosaic fashion; and class III, plants with no obvious phenotype (Fig. 4A). The results clearly showed that guide sequences of 17 nt or fewer had much lower genome-editing efficiencies than those of 18 nt or more (Fig. 4B).

The low genome editing efficiency when using the gRNAs with 17-nt and 16-nt guide lengths could have been caused by their reduced expression levels due to the lack of an initial guanine. Thus, we investigated the effects of addition of an guanine to the 5' end of gRNAs (using pMpGE\_En03), which should facilitate transcription by pol III [39]. However, no clear improvement in genome editing efficiency was observed (Fig. S5). These results suggest that the occurrence of lower genome editing events in *M. polymorpha* may strongly depend on the length of a guide sequence that perfectly matches the target genome, which should be 18 nt or longer.

### Assessments of off target effects

As plants obtained by transformation with pMpGE010/011 stably express Cas9 and a gRNA, genome sites with sequences similar to that of a gRNA are always at risk of genome editing. Sequencing analysis of the genome of more than 30 T1 plants that harbored on-target mutations in the ARF1\_1 or NOP1\_1 target locus revealed no mutation at any of the three most potential off-target sites (Table 1). Collectively, it is suggested that genome editing efficiencies in off-target sites are much lower than those in on-target sites in *M. polymorpha*.



## ***De novo* mutations after prolonged culture**

The stable expression of the CRISPR/Cas9 system should provide continuous opportunities for targeted mutagenesis in transformants until a mutation has been introduced. We analyzed gemmae (G1 generation [18]) derived from pMpGE010\_NOP1\_1 T1 transformants that had shown sectors of transparent (mutant) and non-transparent (wild-type) thallus regions in one individual (Fig. 5A). As expected, G1 gammalings obtained from transparent sectors basically inherited the same mutations as those found in their corresponding T1 sectors (Fig. 5B). Concurrently, some gammalings from non-transparent sectors were found to contain *de novo* mutations, which were different from those in the transparent sectors of the same parent individuals (Fig. 5B, C). These results indicate that various allelic mutants can be isolated from single non-mutated transformants.

## **Induction of large deletion using two gRNAs**

Previous studies have reported that CRISPR/Cas9 system could induce deletions between two gRNA target sites in mosses [8]. Accordingly, induction of large deletions using two gRNAs was tested in *M. polymorpha*. We designed four gRNAs to the MpNOP1 gene, NOP1\_3, NOP1\_4, NOP1\_5, and NOP1\_6 (Fig. 6A). Simultaneous introduction of pMpGE013 and pMpGE014 harboring different combinations of gRNAs was conducted, and transformants were selected with both hygromycin and chlorsulfuron. Deletions of expected sizes from the gRNA combinations, that is, a 0.5 kbp deletion with NOP1\_3 and NOP1\_4, a 1.5 kbp deletion with NOP1\_3 and NOP1\_5, and a 4.5 kbp deletion with NOP1\_3 and NOP1\_6, were detected, respectively (Fig. 6B). The efficiencies of induction of large deletions were almost comparable regardless of the deletion size: 9/26 for 0.5 kbp,

4/20 for 1.5 kbp, and 6/23 for 4.5 kbp (Fig. 6C). These large-deletion lines displayed the *MpnopI* phenotype. (Fig. S6). Collectively, the induction of large deletions with this system would also be applicable for functional analysis of genes in general in *M. polymorpha*.

### One-step generation of conditional knockout mutants

Mutants that exhibit phenotypes under certain conditions are useful when a gene of interest has multiple roles in the life cycle and/or, in particular, essential functions. In this study, we provide methodology for obtaining conditional knockout mutants in a single step using the CRISPR/Cas9 system for mutagenesis and an inducible Cre-*loxP* site-specific recombination for complementation. As our model, we chose one of the three mitogen-activated protein kinase (MAPK) genes in *M. polymorpha*, *MpMPK1* [16], which was predicted to be an essential gene because attempts to obtain knockout mutants by the homologous-recombination-based gene targeting method [22] had failed.

We constructed pMpGE010 harboring a gRNA that was designed to target the first exon-intron junction in *MpMPK1* (Fig. 7A). Because the conjunction between exons 1 and 2 does not reconstitute the PAM sequence for this gRNA (Fig. 7A), it is not supposed to target the *MpMPK1* cDNA. Thus, for complementation, we cloned an *MpMPK1* cDNA into the binary vector pMpGWB337 [23] or its derivative pMpGWB337tdTN (Fig. S7), both of which normally drive expression of the cDNA but inducibly allow deletion of the cDNA and expression of a fluorescent protein after application of heat shock and DEX. Transformation of sporelings with only the *MpMPK1* CRISPR vector yielded a small number of mosaic mutants but no monoclonal frameshift mutants (Fig. 7B), which is indicative of possible lethality for

genome editing at the target site. However, simultaneous transformation with the same CRISPR vector and either of the complementation vectors described above gave rise to monoclonal frameshift mutants at high frequencies (Fig. 7B, C). These data suggest that the cDNA resistant to the gRNA allowed complementation of deleterious mutations in the endogenous *MpMPK1* locus. These complemented mutants grew normally and were fluorescent negative under mock conditions, whereas upon heat shock and DEX treatment, they grew extremely slowly and became fluorescent positive (Fig. 7D). Induction of cDNA deletion was confirmed by genomic PCR analysis (Fig. 7E). These results suggest that *MpMPK1* is indeed a nearly essential gene and, more importantly, demonstrated that conditional knockout mutants of an essential gene can be generated by a simple procedure using a CRISPR/Cas9 vector and a pMpGWB337 derivative in *M. polymorpha*.

## Discussion

Using the *Atco-Cas9* expression cassette, we successfully optimized the CRISPR/Cas9-based genome editing system for *M. polymorpha* and improved the efficiency to a degree that does not require target gene-based phenotypic selection. This is consistent with a previous report that codon optimization of Cas9 lead to significant improvement in efficiency [40]. In the pMpGE010/011 system, over 70% of transformants underwent targeted mutagenesis, shown by the two gRNAs ARF1\_1 and NOP1\_1 (Figs. 1, 2). These results indicate that the pMpGE010/011 vectors are highly reliable for obtaining genome-edited lines in *M. polymorpha*. Since the GC content of the *M. polymorpha* genome is 49.8% [16], Cas9 target sites with NGG PAM sequences can be found at high probability, and the selection of gRNA target sites with small numbers of off-target sites is possible. Taken together, we conclude

that the pMpGE010/pMpGE011 system is feasible to use for functional genetics in *M. polymorpha* with likely avoidance of off-target effects.

As the system presented here allows constant expression of both Cas9 and a gRNA, two risks are conceivable: (i) a side effect of the overexpression of Cas9 protein on plant development and (ii) genome editing events at off-target sites. However, both risks appear to be negligible. Firstly, *Mpnop1* mutants obtained with our CRISPR system were indistinguishable in terms of growth and morphology from those obtained by T-DNA tagging [22] or gene targeting [37] (Fig. 3A). In addition, the conditional *Mmpmk1* mutants generated in this study did not show any noticeable developmental defects (Fig. 7D). These observations suggest that there is no detrimental effect of Cas9 overexpression on plant development.

Sequencing of several potential off-target sites of 20-nt guide sequences revealed remarkably low off-target effects: no mutation was observed at any of the sites in over 30 lines that had on-target mutations. In plants, a similar low-level off-target effect was reported for Arabidopsis [14]. It was reported that truncated gRNA guide sequences (17 nt and 18 nt) show low off-target activities in mammalian cells [38]. In *M. polymorpha*, 17-nt and shorter gRNA guide sequences were not effective (Fig. 3). Taken together with the observed low off-target effects, to avoid unstable outcomes in isolating genome-edited lines, it is recommended to use gRNAs with 18-nt or longer guide sequences in *M. polymorpha*.

Constant expression of the CRISPR system allows transformants that have not had any alteration to potentially acquire mutations later at the target site in random cells during growth. Indeed, we observed that pMpGE010-transformed thalli with no target mutation in the T1 generation produced gametes with *de novo* mutations (Fig. 5). This feature would be convenient for isolating mutant alleles without further

transformation and could also be used for mosaic analyses. Conversely, even if a monoclonal mutant pattern is detected in genotyping using a portion of T1 plants, it does not guarantee that the whole plant has the same genotype. For genotyping, it is recommended to use a piece of T1 tissue from the basal side of the apical notch, as G1 gemmae derived from its apical-side tissues are most likely to be clones, with an identical genotype to that found in T1 [17].

Diploid or polyploid plants can bear lethal mutations heterozygously if recessive, whereas *M. polymorpha*, a haploid-dominant plant, cannot. Therefore, functional analyses of essential genes require alternate strategies. Flores-Sandoval (2016) reported an inducible system for artificial microRNA expression in *M. polymorpha*. Another strategy would be to create conditional knockout mutants. In mice, this is usually achieved by inserting *loxP* sites into two different introns in the same direction with homologous-recombination-mediated gene targeting, and then expressing Cre recombinase at a specific time and/or location to remove an essential exon [41]. For *M. polymorpha*, we avoided using a laborious gene-targeting-based strategy. Instead, we established a method to generate a conditional knockout mutant by simultaneous introduction of a mutation in the endogenous target gene by the CRISPR/Cas9 system and of a conditionally removable complementation gene as a transgene.

In this strategy, the complementation gene cassette must have a structure that cannot be targeted by the gRNA used for knocking out the target gene. Although this “gRNA-resistant” complementation cassette can be prepared by introducing synonymous substitutions in the matching sequence, extra time is required. Thus, if possible, we recommend complementation, by expressing a non-modified cDNA, of mutations caused by a non-cDNA-targeting gRNA, which can be designed at exon-

intron junctions. A DNA fragment for complementation can be inserted between two *loxP* sites in pMpGWB337 [23] or its derivatives with different fluorescent protein markers (Fig. S7), all-in-one vectors equipped with a floxed Gateway cassette for introducing a complementing gene and with a heat-shock- and DEX-inducible Cre recombinase expression cassette.

Using this method, we successfully isolated transformants with a mutation in the MpMPK1 locus, which was expected to be essential. MpMPK1 is one of the three genes encoding canonical MAPKs and is most closely related to those categorized as groups A and B for plant MAPKs [16, 42]. Major Arabidopsis MAPKs in these groups (MPK3/MPK6 and MPK4, respectively) have been shown to regulate various aspects of growth and development [43]: *mpk3 mpk6* double mutants are embryonic lethal [44], and *mpk4* mutants show growth retardation with a cytokinesis defect [45]. The co-transformation-generated transgenic plants that had a mutation in the endogenous MpMPK1 locus exhibited no growth defect due to complementation by the expression of an MpMPK1 cDNA (Fig. 7). Induction of Cre-*loxP* recombination by heat shock and DEX treatment resulted in severe growth defects, indicating that MpMPK1 plays a critical role in the regulation of growth and development in *M. polymorpha* and that the conditional induction of the mutant phenotypes successfully occurred. Sectors of non-abnormal tissues sometimes arose, probably due to occasional failure of the Cre-*loxP* recombination. Thus, it is important to select conditional lines with highly efficient recombination induction from independently isolated candidates. The conditional knockout system developed in this study should not only facilitate functional analyses of essential genes, but also be useful for uncovering functions of non-essential genes in specific locations or timings.

DSBs created by CRISPR/Cas9-based genome editing are usually repaired by the NHEJ pathway. Although the error-prone NHEJ repair pathway randomly inserts or deletes bases at the DSB sites, some tendencies were observed in *M. polymorpha*. For example, mutants with a >20 bp deletion were frequently obtained (Figs. 1, 2), while such mutations are rare in genome editing in Arabidopsis [12, 46]. This suggests that the NHEJ-based repair activity in *M. polymorpha* is relatively weaker than that in Arabidopsis. Consistent with this idea, homologous recombination-based gene targeting is possible in *M. polymorpha* with the average rate of 2-3%, which is much higher than in Arabidopsis [22]. Since DSBs induced by the CRISPR/Cas9 system were reported to increase the efficiency of homologous recombination [47], it would be possible to improve the gene targeting efficiency in *M. polymorpha* by combination with the vectors presented in this study. Another frequently observed feature was the repair of DSBs by the microhomology-mediated end joining (MMEJ) pathway (Fig. S8). Thus, precise integration of a DNA construct into target loci assisted by MMEJ, which is available for animals [48, 49], would also be possible in *M. polymorpha*.

Construction of the genome editing vectors in the present study was very simple and inexpensive. Together with the fact that *M. polymorpha* has low redundancy and small numbers of regulatory genes, our highly efficient CRISPR/Cas9 system would allow genome-editing-based genetic screens targeting all genes in a large subset of the genome, e.g., protein kinases, transcription factors, and miRNAs [16, 50, 51]. Since the “pMpGE” CRISPR/Cas9-based genome editing vectors reported in this study possess 35S promoter-based marker cassettes, the vectors can be utilized for genome editing in other plants in which *MpEF<sub>pro</sub>* and *MpU6<sub>pro</sub>* are operable. Highly efficient genome editing should facilitate uncovering

gene regulatory networks that evolved for the land adaptation of plants and that underlie subsequent successful expansion of land plants.

## **Supporting information**

S1 Supplementary Figures S1-S8 (PDF)

S2 Supplementary Table S1(.xlsx file)

## **Data availability**

The complete nucleotide sequences of the pMpGEs have been deposited in the GenBank/EMBL/DDBJ databases under the accessions nos. LC090754 to LC090757. pMpGE plasmids can be obtained from Addgene ([www.addgene.org](http://www.addgene.org); plasmid numbers 71534–71537).

## **Acknowledgements**

We thank H. Puchta for the gifts of the pDe-CAS9 material, including Atco-Cas9. We thank S. Yamaoka, K.T. Yamato, S. Zachgo, Y. Osakabe, M. Endo, and S. Toki for helpful discussion. We also thank J. Haseloff and B. Pollak for the gRNA sequence of the Mp*NOPI* gene. We thank M. Fukuhara, Y. Hatta, and Y. Koumoto for their technical assistance.

## **Author contribution**

TK, RN, and SSS conceived of the study and participated in its design and coordination. SSS, KO, and IHN designed the pMpGE vectors, and SSS, MS, JT, and YM constructed these vectors. RN designed the pMpGWB337 derivative vectors, and SI constructed these vectors. RN designed and RN, YM, and SI conducted the



conditional knockout experiments. SSS and TS conducted the large deletion assays.  
YM conducted most of the other experiments. TK, RN, and SSS wrote the manuscript  
with inputs from co-authors.

## References

1. Doudna JA, Charpentier E. Genome editing. The new frontier of genome engineering with CRISPR-Cas9. *Science*. 2014;346(6213):1258096. Epub 2014/11/29. doi: 10.1126/science.1258096  
1258096 [pii]  
346/6213/1258096 [pii]. PubMed PMID: 25430774.
2. Zhang F. CRISPR-Cas9: Prospects and Challenges. *Hum Gene Ther*. 2015;26(7):409-10. Epub 2015/07/16. doi: 10.1089/hum.2015.29002.fzh. PubMed PMID: 26176430; PubMed Central PMCID: PMC4939442.
3. Jinek M, Chylinski K, Fonfara I, Hauer M, Doudna JA, Charpentier E. A programmable dual-RNA-guided DNA endonuclease in adaptive bacterial immunity. *Science*. 2012;337(6096):816-21. Epub 2012/06/30. doi: 10.1126/science.1225829. PubMed PMID: 22745249.
4. Gaj T, Sirk SJ, Shui SL, Liu J. Genome-Editing Technologies: Principles and Applications. *Cold Spring Harb Perspect Biol*. 2016;8(12). Epub 2016/12/03. doi: a023754 [pii]  
10.1101/cshperspect.a023754  
cshperspect.a023754 [pii]. PubMed PMID: 27908936.
5. Puchta H. Applying CRISPR/Cas for genome engineering in plants: the best is yet to come. *Curr Opin Plant Biol*. 2016;36:1-8. Epub 2016/12/04. doi: S1369-5266(16)30125-X [pii]

612 10.1016/j.pbi.2016.11.011. PubMed PMID: 27914284.

613 6. Yin K, Gao C, Qiu JL. Progress and prospects in plant genome editing. Nat  
614 Plants. 2017;3:17107. Epub 2017/08/02. doi: 10.1038/nplants.2017.107. PubMed  
615 PMID: 28758991.

616 7. Osakabe Y, Osakabe K. Genome editing with engineered nucleases in plants.  
617 Plant Cell Physiol. 2015;56(3):389-400. Epub 2014/11/25. doi: 10.1093/pcp/pcu170.  
618 PubMed PMID: 25416289.

619 8. Nomura T, Sakurai T, Osakabe Y, Osakabe K, Sakakibara H. Efficient and  
620 Heritable Targeted Mutagenesis in Mosses Using the CRISPR/Cas9 System. Plant  
621 Cell Physiol. 2016;57(12):2600-10. Epub 2016/12/18. doi: 10.1093/pcp/pcw173.  
622 PubMed PMID: 27986915.

623 9. Lopez-Obando M, Hoffmann B, Gery C, Guyon-Debast A, Teoule E, Rameau  
624 C, et al. Simple and Efficient Targeting of Multiple Genes Through CRISPR-Cas9 in  
625 Physcomitrella patens. G3 (Bethesda). 2016. Epub 2016/09/11. doi:  
626 10.1534/g3.116.033266. PubMed PMID: 27613750; PubMed Central PMCID:  
627 PMCPMC5100863.

628 10. Greiner A, Kelterborn S, Evers H, Kreimer G, Sizova I, Hegemann P.  
629 Targeting of Photoreceptor Genes in Chlamydomonas reinhardtii via Zinc-Finger  
630 Nucleases and CRISPR/Cas9. Plant Cell. 2017;29(10):2498-518. Epub 2017/10/06.  
631 doi: 10.1105/tpc.17.00659. PubMed PMID: 28978758.

632 11. Ferenczi A, Pyott DE, Xipnitou A, Molnar A. Efficient targeted DNA editing  
633 and replacement in Chlamydomonas reinhardtii using Cpf1 ribonucleoproteins and  
634 single-stranded DNA. Proc Natl Acad Sci U S A. 2017;114(51):13567-72. Epub  
635 2017/12/07. doi: 10.1073/pnas.1710597114. PubMed PMID: 29208717; PubMed  
636 Central PMCID: PMCPMC5754772.

- 637 12. Fauser F, Schiml S, Puchta H. Both CRISPR/Cas-based nucleases and  
638 nickases can be used efficiently for genome engineering in *Arabidopsis thaliana*. *Plant*  
639 *J.* 2014;79(2):348-59. Epub 2014/05/20. doi: 10.1111/tpj.12554. PubMed PMID:  
640 24836556.
- 641 13. Wang Y, Cheng X, Shan Q, Zhang Y, Liu J, Gao C, et al. Simultaneous  
642 editing of three homoeoalleles in hexaploid bread wheat confers heritable resistance  
643 to powdery mildew. *Nat Biotechnol.* 2014;32(9):947-51. Epub 2014/07/21. doi:  
644 10.1038/nbt.2969  
645 nbt.2969 [pii]. PubMed PMID: 25038773.
- 646 14. Feng Z, Mao Y, Xu N, Zhang B, Wei P, Yang DL, et al. Multigeneration  
647 analysis reveals the inheritance, specificity, and patterns of CRISPR/Cas-induced  
648 gene modifications in *Arabidopsis*. *Proc Natl Acad Sci U S A.* 2014;111(12):4632-7.  
649 Epub 2014/02/20. doi: 10.1073/pnas.1400822111  
650 1400822111 [pii]. PubMed PMID: 24550464; PubMed Central PMCID:  
651 PMC3970504.
- 652 15. Chang C, Bowman JL, Meyerowitz EM. Field Guide to Plant Model Systems.  
653 *Cell.* 2016;167(2):325-39. Epub 2016/10/08. doi: S0092-8674(16)31082-0 [pii]  
654 10.1016/j.cell.2016.08.031. PubMed PMID: 27716506; PubMed Central PMCID:  
655 PMC5068971.
- 656 16. Bowman JL, Kohchi T, Yamato KT, Jenkins J, Shu S, Ishizaki K, et al.  
657 Insights into Land Plant Evolution Garnered from the *Marchantia polymorpha*  
658 *Genome*. *Cell.* 2017;171(2):287-304 e15. Epub 2017/10/07. doi:  
659 10.1016/j.cell.2017.09.030. PubMed PMID: 28985561.

- 660 17. Barnes CR, Land WJG. Bryological papers II. The origin of the cupule of  
661 marchantia - Contributions from the hull botanical laboratory 120. Bot Gaz.  
662 1908;46:401-9. PubMed PMID: ISI:000202146600029.
- 663 18. Ishizaki K, Nishihama R, Yamato KT, Kohchi T. Molecular Genetic Tools  
664 and Techniques for Marchantia polymorpha Research. Plant Cell Physiol.  
665 2016;57(2):262-70. Epub 2015/06/28. doi: 10.1093/pcp/pcv097  
666 pcv097 [pii]. PubMed PMID: 26116421.
- 667 19. Ishizaki K, Chiyoda S, Yamato KT, Kohchi T. Agrobacterium-mediated  
668 transformation of the haploid liverwort Marchantia polymorpha L., an emerging  
669 model for plant biology. Plant Cell Physiol. 2008;49(7):1084-91. Epub 2008/06/07.  
670 doi: 10.1093/pcp/pcn085  
671 pcn085 [pii]. PubMed PMID: 18535011.
- 672 20. Kubota A, Ishizaki K, Hosaka M, Kohchi T. Efficient Agrobacterium-  
673 mediated transformation of the liverwort Marchantia polymorpha using regenerating  
674 thalli. Biosci Biotechnol Biochem. 2013;77(1):167-72. Epub 2013/01/08. doi:  
675 10.1271/bbb.120700. PubMed PMID: 23291762.
- 676 21. Tsuboyama-Tanaka S, Kodama Y. AgarTrap-mediated genetic transformation  
677 using intact gemmae/gemmalings of the liverwort Marchantia polymorpha L. J Plant  
678 Res. 2015;128(2):337-44. Epub 2015/02/11. doi: 10.1007/s10265-014-0695-2.  
679 PubMed PMID: 25663453.
- 680 22. Ishizaki K, Johzuka-Hisatomi Y, Ishida S, Iida S, Kohchi T. Homologous  
681 recombination-mediated gene targeting in the liverwort Marchantia polymorpha L.  
682 Sci Rep. 2013;3:1532. Epub 2013/03/26. doi: 10.1038/srep01532  
683 srep01532 [pii]. PubMed PMID: 23524944; PubMed Central PMCID: PMC3607118.

684 23. Nishihama R, Ishida S, Urawa H, Kamei Y, Kohchi T. Conditional Gene  
685 Expression/Deletion Systems for *Marchantia polymorpha* Using its Own Heat-Shock  
686 Promoter and Cre/loxP-Mediated Site-Specific Recombination. *Plant Cell Physiol.*  
687 2016;57(2):271-80. Epub 2015/07/08. doi: 10.1093/pcp/pcv102  
688 pcv102 [pii]. PubMed PMID: 26148498.

689 24. Kopischke S, Schussler E, Althoff F, Zachgo S. TALEN-mediated genome-  
690 editing approaches in the liverwort *Marchantia polymorpha* yield high efficiencies for  
691 targeted mutagenesis. *Plant Methods.* 2017;13:20. Epub 2017/04/01. doi:  
692 10.1186/s13007-017-0167-5. PubMed PMID: 28360929; PubMed Central PMCID:  
693 PMCPMC5370431.

694 25. Sugano SS, Shirakawa M, Takagi J, Matsuda Y, Shimada T, Hara-Nishimura I,  
695 et al. CRISPR/Cas9-mediated targeted mutagenesis in the liverwort *Marchantia*  
696 *polymorpha* L. *Plant Cell Physiol.* 2014;55(3):475-81. Epub 2014/01/21. doi:  
697 10.1093/pcp/pcu014  
698 pcu014 [pii]. PubMed PMID: 24443494.

699 26. Mikami M, Toki S, Endo M. Comparison of CRISPR/Cas9 expression  
700 constructs for efficient targeted mutagenesis in rice. *Plant Mol Biol.* 2015;88(6):561-  
701 72. Epub 2015/07/21. doi: 10.1007/s11103-015-0342-x. PubMed PMID: 26188471;  
702 PubMed Central PMCID: PMC4523696.

703 27. Johnson RA, Gurevich V, Filler S, Samach A, Levy AA. Comparative  
704 assessments of CRISPR-Cas nucleases' cleavage efficiency in *planta*. *Plant Mol Biol.*  
705 2015;87(1-2):143-56. Epub 2014/11/19. doi: 10.1007/s11103-014-0266-x. PubMed  
706 PMID: 25403732.

707 28. Gamborg OL, Miller RA, Ojima K. Nutrient requirements of suspension  
708 cultures of soybean root cells. *Exp Cell Res.* 1968;50(1):151-8. Epub 1968/04/01.  
709 PubMed PMID: 5650857.

710 29. Ishizaki K, Nishihama R, Ueda M, Inoue K, Ishida S, Nishimura Y, et al.  
711 Development of Gateway Binary Vector Series with Four Different Selection Markers  
712 for the Liverwort *Marchantia polymorpha*. *PLoS One.* 2015;10(9):e0138876. Epub  
713 2015/09/26. doi: 10.1371/journal.pone.0138876. PubMed PMID: 26406247; PubMed  
714 Central PMCID: PMCPMC4583185.

715 30. Nakagawa T, Kurose T, Hino T, Tanaka K, Kawamukai M, Niwa Y, et al.  
716 Development of series of gateway binary vectors, pGWBs, for realizing efficient  
717 construction of fusion genes for plant transformation. *J Biosci Bioeng.*  
718 2007;104(1):34-41. Epub 2007/08/19. doi: 10.1263/jbb.104.34. PubMed PMID:  
719 17697981.

720 31. Xiao A, Cheng Z, Kong L, Zhu Z, Lin S, Gao G, et al. CasOT: a genome-wide  
721 Cas9/gRNA off-target searching tool. *Bioinformatics.* 2014;30(8):1180-2. Epub  
722 2014/04/15. doi: btt764 [pii]  
723 10.1093/bioinformatics/btt764. PubMed PMID: 24389662.

724 32. Althoff F, Kopischke S, Zobell O, Ide K, Ishizaki K, Kohchi T, et al.  
725 Comparison of the MpEF1alpha and CaMV35 promoters for application in  
726 *Marchantia polymorpha* overexpression studies. *Transgenic Res.* 2013. Epub  
727 2013/09/17. doi: 10.1007/s11248-013-9746-z. PubMed PMID: 24036909.

728 33. Kato H, Ishizaki K, Kouno M, Shirakawa M, Bowman JL, Nishihama R, et al.  
729 Auxin-Mediated Transcriptional System with a Minimal Set of Components Is  
730 Critical for Morphogenesis through the Life Cycle in *Marchantia polymorpha*. *PLoS*  
731 *Genet.* 2015;11(5):e1005084. Epub 2015/05/29. doi: 10.1371/journal.pgen.1005084

732 PGENETICS-D-14-02665 [pii]. PubMed PMID: 26020919; PubMed Central PMCID:  
733 PMC4447296.

734 34. Flores-Sandoval E, Eklund DM, Bowman JL. A Simple Auxin Transcriptional  
735 Response System Regulates Multiple Morphogenetic Processes in the Liverwort  
736 *Marchantia polymorpha*. PLoS Genet. 2015;11(5):e1005207. Epub 2015/05/29. doi:  
737 10.1371/journal.pgen.1005207

738 PGENETICS-D-14-02661 [pii]. PubMed PMID: 26020649; PubMed Central PMCID:  
739 PMC4447368.

740 35. Kato H, Kouno M, Takeda M, Suzuki H, Ishizaki K, Nishihama R, et al. The  
741 Roles of the Sole Activator-Type Auxin Response Factor in Pattern Formation of  
742 *Marchantia polymorpha*. Plant Cell Physiol. 2017;58(10):1642-51. Epub 2017/10/11.  
743 doi: 10.1093/pcp/pcx095. PubMed PMID: 29016901.

744 36. Ma H, Wu Y, Dang Y, Choi JG, Zhang J, Wu H. Pol III Promoters to Express  
745 Small RNAs: Delineation of Transcription Initiation. Mol Ther Nucleic Acids.  
746 2014;3:e161. Epub 2014/05/08. doi: 10.1038/mtna.2014.12. PubMed PMID:  
747 24803291; PubMed Central PMCID: PMC4040628.

748 37. Ishizaki K, Mizutani M, Shimamura M, Masuda A, Nishihama R, Kohchi T.  
749 Essential role of the E3 ubiquitin ligase nopperabo1 in schizogenous intercellular  
750 space formation in the liverwort *Marchantia polymorpha*. Plant Cell.  
751 2013;25(10):4075-84. Epub 2013/10/31. doi: 10.1105/tpc.113.117051  
752 tpc.113.117051 [pii]. PubMed PMID: 24170128; PubMed Central PMCID:  
753 PMC3877802.

754 38. Fu Y, Sander JD, Reyon D, Cascio VM, Joung JK. Improving CRISPR-Cas  
755 nuclease specificity using truncated guide RNAs. Nat Biotechnol. 2014;32(3):279-84.

756 doi: 10.1038/nbt.2808. PubMed PMID: 24463574; PubMed Central PMCID:  
757 PMCPMC3988262.

758 39. Ma J, Wang MD. RNA polymerase is a powerful torsional motor. *Cell Cycle*.  
759 2014;13(3):337-8. Epub 2013/12/18. doi: 10.4161/cc.27508. PubMed PMID:  
760 24335432; PubMed Central PMCID: PMCPMC3956522.

761 40. Endo M, Mikami M, Toki S. Multigene knockout utilizing off-target  
762 mutations of the CRISPR/Cas9 system in rice. *Plant Cell Physiol*. 2015;56(1):41-7.  
763 Epub 2014/11/14. doi: 10.1093/pcp/pcu154  
764 pcu154 [pii]. PubMed PMID: 25392068; PubMed Central PMCID: PMC4301742.

765 41. Hall B, Limaye A, Kulkarni AB. Overview: generation of gene knockout mice.  
766 *Curr Protoc Cell Biol*. 2009;Chapter 19:Unit 19 2 2 1-7. Epub 2009/09/05. doi:  
767 10.1002/0471143030.cb1912s44. PubMed PMID: 19731224; PubMed Central  
768 PMCID: PMCPMC2782548.

769 42. Group M. Mitogen-activated protein kinase cascades in plants: a new  
770 nomenclature. *Trends Plant Sci*. 2002;7(7):301-8. Epub 2002/07/18. PubMed PMID:  
771 12119167.

772 43. Xu J, Zhang S. Mitogen-activated protein kinase cascades in signaling plant  
773 growth and development. *Trends Plant Sci*. 2015;20(1):56-64. Epub 2014/12/03. doi:  
774 10.1016/j.tplants.2014.10.001. PubMed PMID: 25457109.

775 44. Wang H, Ngwenyama N, Liu Y, Walker JC, Zhang S. Stomatal development  
776 and patterning are regulated by environmentally responsive mitogen-activated protein  
777 kinases in Arabidopsis. *Plant Cell*. 2007;19(1):63-73. Epub 2007/01/30. doi:  
778 10.1105/tpc.106.048298. PubMed PMID: 17259259; PubMed Central PMCID:  
779 PMCPMC1820971.



- 780 45. Kosetsu K, Matsunaga S, Nakagami H, Colcombet J, Sasabe M, Soyano T, et  
781 al. The MAP kinase MPK4 is required for cytokinesis in *Arabidopsis thaliana*. *Plant*  
782 *Cell*. 2010;22(11):3778-90. Epub 2010/11/26. doi: 10.1105/tpc.110.077164. PubMed  
783 PMID: 21098735; PubMed Central PMCID: PMC3015120.
- 784 46. Shen H, Strunks GD, Klemann BJ, Hooykaas PJ, de Pater S. CRISPR/Cas9-  
785 Induced Double-Strand Break Repair in *Arabidopsis* Nonhomologous End-Joining  
786 Mutants. *G3 (Bethesda)*. 2017;7(1):193-202. Epub 2016/11/21. doi:  
787 10.1534/g3.116.035204. PubMed PMID: 27866150; PubMed Central PMCID:  
788 PMC3795411.
- 789 47. Cong L, Ran FA, Cox D, Lin S, Barretto R, Habib N, et al. Multiplex genome  
790 engineering using CRISPR/Cas systems. *Science*. 2013;339(6121):819-23. Epub  
791 2013/01/05. doi: 10.1126/science.1231143  
792 science.1231143 [pii]. PubMed PMID: 23287718; PubMed Central PMCID:  
793 PMC3795411.
- 794 48. Aida T, Nakade S, Sakuma T, Izu Y, Oishi A, Mochida K, et al. Gene cassette  
795 knock-in in mammalian cells and zygotes by enhanced MMEJ. *BMC Genomics*.  
796 2016;17(1):979. Epub 2016/11/30. doi: 10.1186/s12864-016-3331-9. PubMed PMID:  
797 27894274; PubMed Central PMCID: PMC3795411.
- 798 49. Sakuma T, Nakade S, Sakane Y, Suzuki KT, Yamamoto T. MMEJ-assisted  
799 gene knock-in using TALENs and CRISPR-Cas9 with the PITCH systems. *Nat Protoc*.  
800 2016;11(1):118-33. Epub 2015/12/19. doi: 10.1038/nprot.2015.140  
801 nprot.2015.140 [pii]. PubMed PMID: 26678082.
- 802 50. Lin PC, Lu CW, Shen BN, Lee GZ, Bowman JL, Arteaga-Vazquez MA, et al.  
803 Identification of miRNAs and Their Targets in the Liverwort *Marchantia polymorpha*  
804 by Integrating RNA-Seq and Degradome Analyses. *Plant Cell Physiol*.

805 2016;57(2):339-58. Epub 2016/02/11. doi: 10.1093/pcp/pcw020. PubMed PMID:  
806 26861787; PubMed Central PMCID: PMC4788410.  
807 51. Tsuzuki M, Nishihama R, Ishizaki K, Kurihara Y, Matsui M, Bowman JL, et  
808 al. Profiling and Characterization of Small RNAs in the Liverwort, *Marchantia*  
809 *polymorpha*, Belonging to the First Diverged Land Plants. *Plant Cell Physiol.*  
810 2016;57(2):359-72. Epub 2015/11/22. doi: 10.1093/pcp/pcv182. PubMed PMID:  
811 26589267.  
812

## Figure legends

**Fig 1.** Improvement of the *M. polymorpha* CRISPR/Cas9 system by codon optimization.

(A) Diagrams of the vectors used. pMpGE006 contains a cassette for the expression of Atco-Cas9 fused with an NLS under the control of MpEF<sub>pro</sub>. pMpGWB301\_ARF1\_1 contains a cassette for the expression of the gRNA ARF1\_1 under the control of MpU6-*I<sub>pro</sub>* [25]. (B) Photograph of auxin-insensitive co-transformants of the two vectors described in (A). *Agrobacterium*-co-cultured sporelings that corresponded to one eighth of sporangium were plated on a medium in containing 3 µM NAA and two vector selection substances, 10 mg/L hygromycin and 0.5 µM chlorsulfuron. Diameter of the circle dish shows 10 cm. (C) Direct sequencing analysis of the target locus of MpARF1 in auxin-selected T1 co-transformants. Inserted or substituted bases are colored in magenta. The target guide sequence of ARF1\_1 is shown in bold face with the PAM sequence in blue. (D and E) Proportions of genome editing patterns (D) and sequences of the target site (E) in T1 co-transformants, which were obtained with no auxin selection. Sixteen independent transformants were analyzed for the target-site sequence by direct sequencing. “Monoclonal” and “Mosaic” indicate direct sequencing read patterns with mutated sequence peaks only and those with mixed sequence peaks, respectively. “WT” indicates read patterns identical to the original target sequence.

**Fig 2.** All-in-one vector systems for genome editing in *M. polymorpha*.

(A) Designs of Gateway-based all-in-one binary vectors and entry plasmids for gRNA cloning. pMpGE010 and pMpGE011 contain a cassette for the expression of Atco-Cas9 fused with an NLS under the control of MpEF<sub>pro</sub>, a Gateway cassette, and a

cassette for the expression of hygromycin phosphotransferase (*HPT*) in pMpGE010 and mutated acetolactate synthase (*mALS*) in pMpGE011. pMpGE\_En01 contains recognition sites for two restriction enzymes, SacI and PstI, upstream of a gRNA backbone for the insertion of a guide sequence by In-Fusion/Gibson cloning, which automatically places a G nucleotide for transcription initiation by RNA polymerase III (extra initial G). Expression of single guide RNAs is controlled by a 2 kbp fragment of *MpU6-I<sub>pro</sub>*. pMpGE\_En02 and pMpGE\_En03 contain two BsaI recognition sites upstream of the gRNA backbone for the insertion of a guide sequence by ligation without or with an “extra initial G,” whose expression is under the control of a 500 bp *MpU6-I<sub>pro</sub>* fragment. For all the entry vectors, the gRNA cassette is flanked by the attL1 and attL2 sequences and is thus transferrable to the Gateway cassette in pMpGE010 or pMpGWB011 by the LR reaction. (B) Designs of all-in-one binary vectors for direct gRNA cloning. pMpGE013 (*HPT* marker) and pMpGE014 (*mALS* marker) contain the Atco-Cas9-NLS expression cassette, a unique AarI site in the upstream of the gRNA backbone for insertion of a guide sequence by ligation with an “extra initial G,” whose expression is under the control of a 500 bp *MpU6-I<sub>pro</sub>* fragment.

**Fig 3.** High-efficiency genome editing by the gateway-based system in *M. polymorpha*.

Sporelings were transformed with pMpGE010 harboring ARF1\_1 gRNA (A and B) or NOP1\_1 gRNA (C-E). Randomly selected transformants were genotyped. Proportions of genome editing patterns (A and C) and sequences of the target sites (B and D) in 32 T1 transformants are shown as in Fig. 1. Panel E shows photographs of a wild-type

plant (Tak-1) and a T1 transformant that exhibited the typical *NOP1*-defective “transparent” phenotype (*Mpnop1<sup>ge</sup>*).

**Fig 4.** Effects of guide sequence lengths

(A) Classification of phenotypes in *MpNOP1* genome editing lines by the appearance patterns of transparent portions. Class I, entirely transparent (Mutant); class II, mosaic of transparent and non-transparent sectors (Mosaic); class III, entirely non-transparent (wild-type, WT). Scale bars = 1 cm. (B) Proportions of mutant phenotype classes in T1 plants transformed with *MpNOP1*-targeting gRNAs (*NOP1\_2*) of different lengths. The shortest gRNA guide sequence tested was 16 nt. The numbers of T1 plants inspected are shown on the right hand side.

**Fig 5.** *De novo* mutations found in the G1 generation

(A) Delayed generation of new mutants from non-mutated sectors. G1 gemmae formed on a transparent or non-transparent sector of a class-II *Mpnop1<sup>ge</sup>* plant, described in Fig. 4, were grown. Arrowhead shows a transparent sector due to a *de novo* mutation. Scale bar = 1 cm. (B) Proportions of genotypes in G1 populations derived from three independent class-II *Mpnop1<sup>ge</sup>* T1 lines (#7, #11, and #13). “Inherited mutation” and “*de novo* mutation” indicate mutations identical to or different from those identified in individual T1 lines, respectively. (C) Target-site sequences in lines with “Inherited mutation” and “*de novo* mutation” by direct sequencing analysis. Inserted or substituted bases are colored in magenta. The target guide sequence of *NOP1\_1* is shown in bold face with the PAM sequence in blue.

**Fig 6.** Induction of large deletions using co-transformation of two genome editing vectors

(A) Design of gRNAs to the *MpNOLI* locus to dissect efficiencies of induction of large deletions. Grey boxes and lines indicate exons and introns. The dotted line indicates the downstream region of *MpNOLI*. gRNA positions are shown in red lines. Primer sets for PCR-based genotyping are also shown. (B) Representative images of electrophoresis of PCR-based genotyping. The gRNAs and primer sets used in the genotyping are shown. Expected sizes of the PCR products from the wild-type genome are colored in blue. Expected sizes of the PCR products from the genome in which inductions of large deletion occurred are colored in magenta. PCR products from non-specific amplifications are indicated by asterisks. (C) Summary table of the co-transformation experiment using pMpGE013 and pMpGE014. The ratio in the “Large deletion” row shows the number of T1 plants harboring the expected large deletion out of all the T1 plants inspected.

**Fig 7.** Generation of conditional knockout mutants of an essential gene

(A) Gene model of the *MpMPK1* gene and the gRNA target site. Grey boxes and lines indicate exons and introns. “ATG” and “Stop” denote the predicated initiation and termination codons. PAM, target, and intron sequences are shown in blue, in bold, and by small letters, respectively. Note that the third base (g) of the PAM sequence is in intron 1 and that the first base of exon 2 is not G. (B) Targeted mutagenesis rate of the endogenous *MpMPK1* locus by CRISPR/Cas9. Bar graphs show proportions of clonal frameshift (magenta), clonal in-frame (green), mosaic (yellow), and no mutations (grey) that were identified in plants transformed with pMpGE010 containing the gRNA shown in (A) only (Exp. 1) or together with *MpMPK1* cDNA-containing

911 pMpGWB337 (Exp. 2) or pMpGWB337tdTN (Exp. 3). (C) Target-site sequences of  
 912 plants obtained in Exp. 3. Sequences of wild type (WT) and transgenic lines (#1 to #8  
 913 except #4) are shown as in (A). Inserted or deleted bases are colored in magenta with  
 914 their numbers in parentheses. In line #4, a 2 bp insertion and a large 970 bp deletion  
 915 that covers the predicted initiation codon were identified (magenta). (D) Growth  
 916 defect manifested by conditional deletion of the MpMPK1 cDNA. Gemmae of  
 917 transgenic line #4 were (+) or were not (–) subjected to heat shock (HS) and  
 918 dexamethasone (DEX) treatment on day 0 and day 1 and grown at 22°C for 2 weeks  
 919 (top) before observation by fluorescent microscopy for tdTomato-NLS (bottom).  
 920 Scale bars = 5 mm (top); 1 mm (bottom). (E) Confirmation of deletion events by  
 921 genomic PCR. From HS/DEX-treated plants (line #4), tdTomato-positive,  
 922 disorganized tissues ("KO") and tdTomato-negative, thallus-looking sectors [such as  
 923 the arrow in (D); "non"] were collected from two different individuals and analyzed  
 924 by genomic PCR using primer sets 1 and 2 shown in the schematic illustration of the  
 925 construct used (predicted product sizes are indicated) and primer set 3 shown in panel  
 926 (C).  
 927

928 **Table 1 Off target analysis of T1 transformants.**

| Off target name | Sequence                                                       | Mutations detected | Sequenced |
|-----------------|----------------------------------------------------------------|--------------------|-----------|
| ARF1_1_OT1      | GAGACCTTCATGATCAG <b>t</b> AG_TGG 0                            |                    | 39        |
| ARF1_1_OT2      | G <b>t</b> GACC <b>a</b> TCAT <b>ag</b> TCAGGAG_GGG 0          |                    | 39        |
| ARF1_1_OT3      | <b>t</b> AGAT <b>t</b> CTTCATGATCA <b>a</b> GA <b>t</b> _TGG 0 |                    | 39        |
| NOP1_1_OT1      | G <b>ga</b> AGT <b>ac</b> TTGTGAGAGAAT_GGG 0                   |                    | 32        |
| NOP1_1_OT2      | GAT <b>ca</b> TCTTTGT <b>a</b> AGAGAA <b>a</b> _GGG 0          |                    | 32        |
| NOP1_1_OT3      | <b>a</b> ATAG <b>g</b> CTTT <b>a</b> TGA <b>a</b> AGAAT_GGG 0  |                    | 32        |

929 Each sequencing analysis was conducted using genomic DNA of lines harboring  
930 mutations in on-target sites. Mismatches to the guide sequences are shown in lower  
931 bold case.



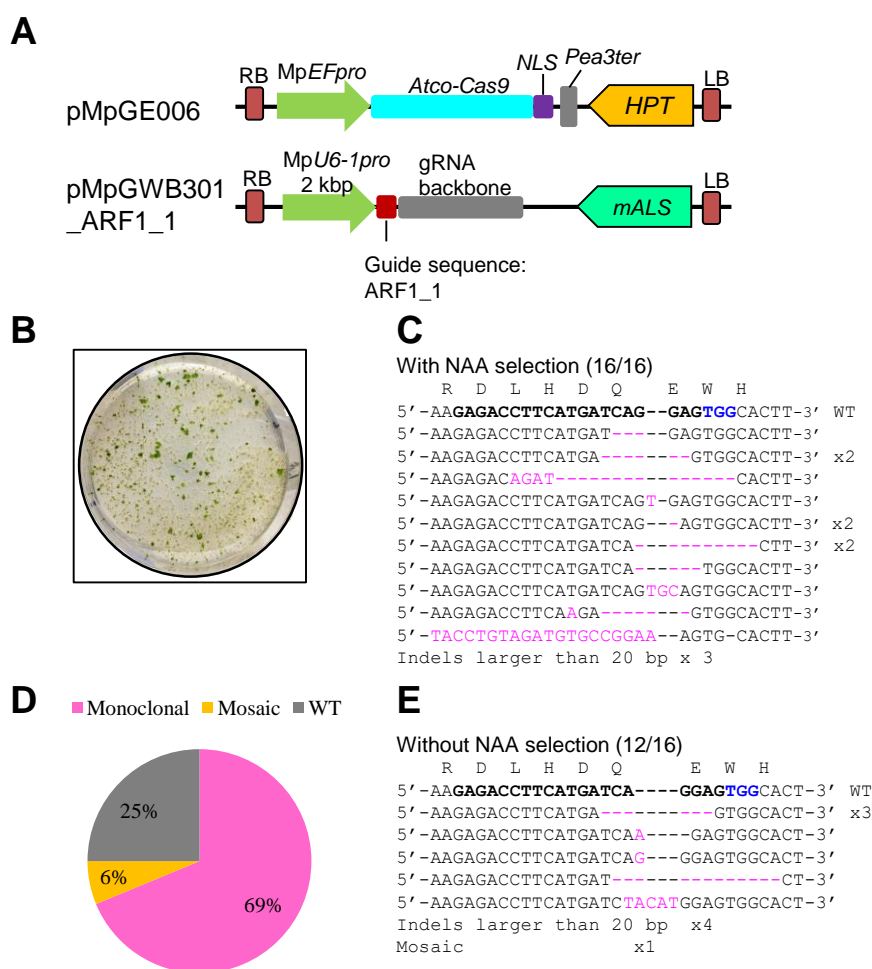

Figure 1.

Shigeo S. Sugano, Ryuichi Nishihama, Makoto Shirakawa, Junpei Takagi, Yoriko Matsuda, Sakiko Ishida, Tomoo Shimada, Ikuko Hara-Nishimura, Keishi Osakabe, and Takayuki Kohchi

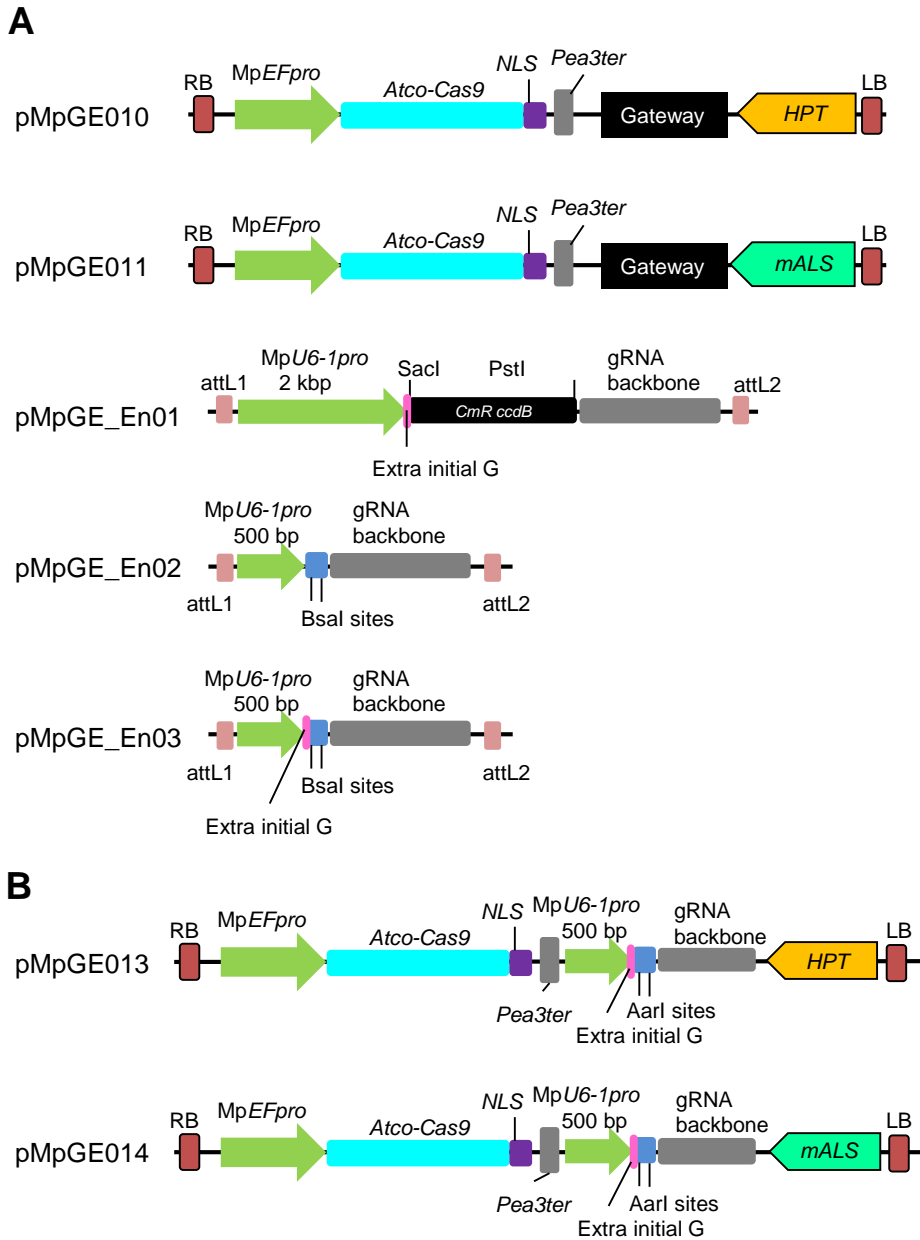

**Figure 2.**  
 Shigeo S. Sugano, Ryuichi Nishihama, Makoto Shirakawa, Junpei Takagi,  
 Yoriko Matsuda, Sakiko Ishida, Tomoo Shimada, Ikuko Hara-Nishimura,  
 Keishi Osakabe, and Takayuki Kohchi

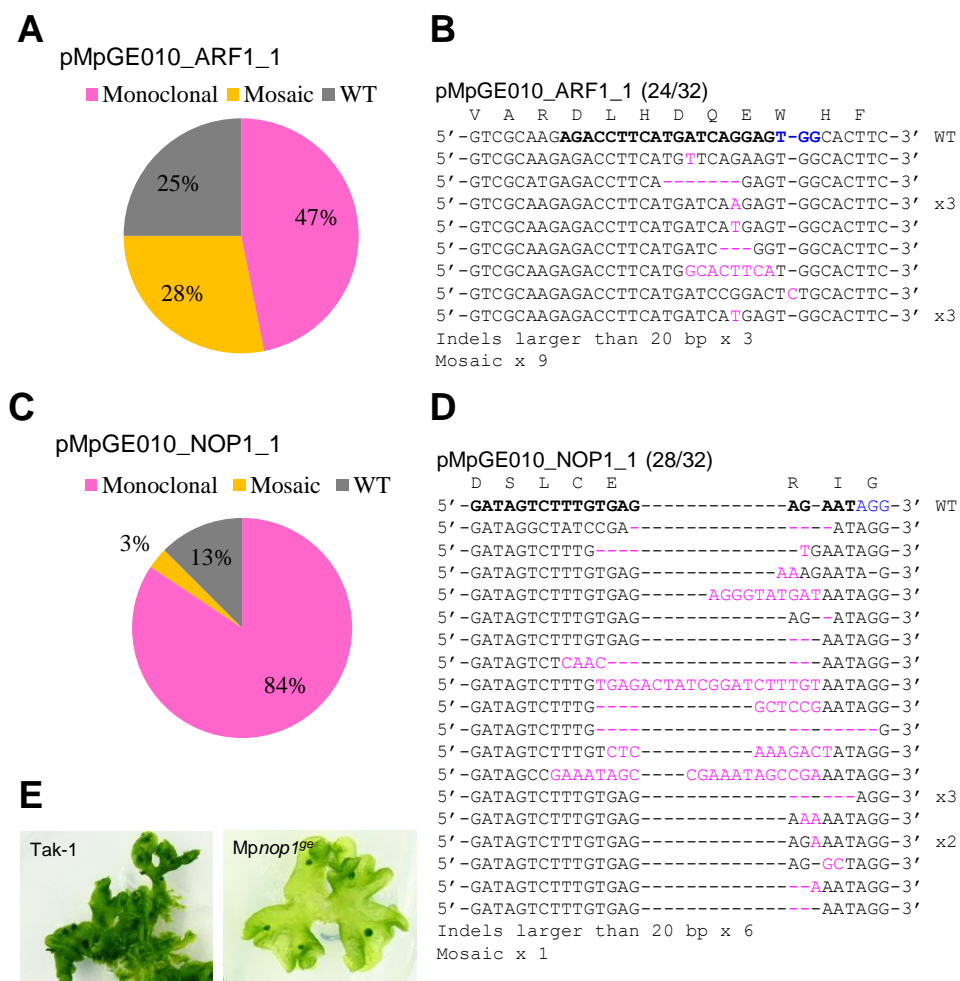

Figure 3.

Shigeo S. Sugano, Ryuichi Nishihama, Makoto Shirakawa, Junpei Takagi, Yoriko Matsuda, Sakiko Ishida, Tomoo Shimada, Ikuko Hara-Nishimura, Keishi Osakabe, and Takayuki Kohchi

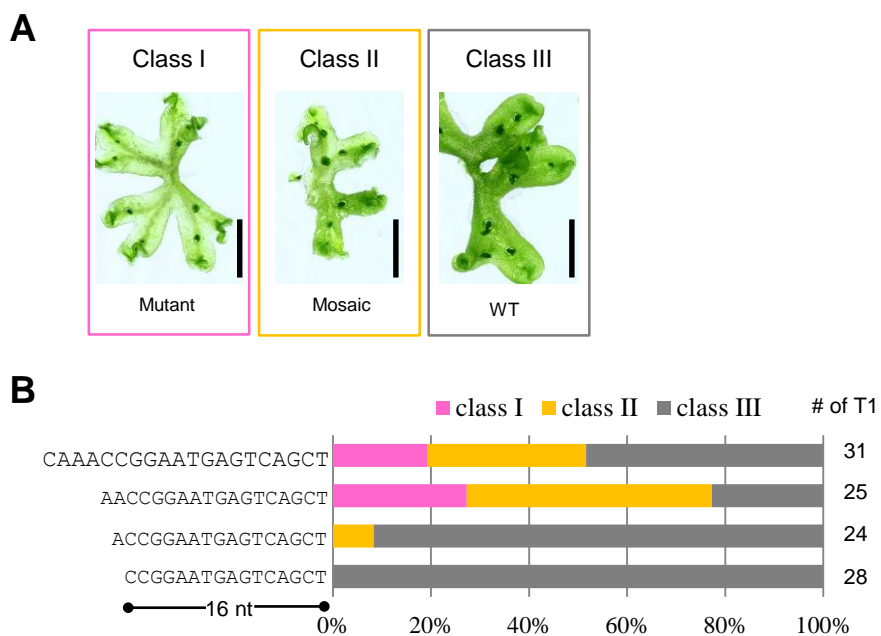

Figure 4.

Shigeo S. Sugano, Ryuichi Nishihama, Makoto Shirakawa, Junpei Takagi, Yoriko Matsuda, Sakiko Ishida, Tomoo Shimada, Ikuko Hara-Nishimura, Keishi Osakabe, and Takayuki Kohchi

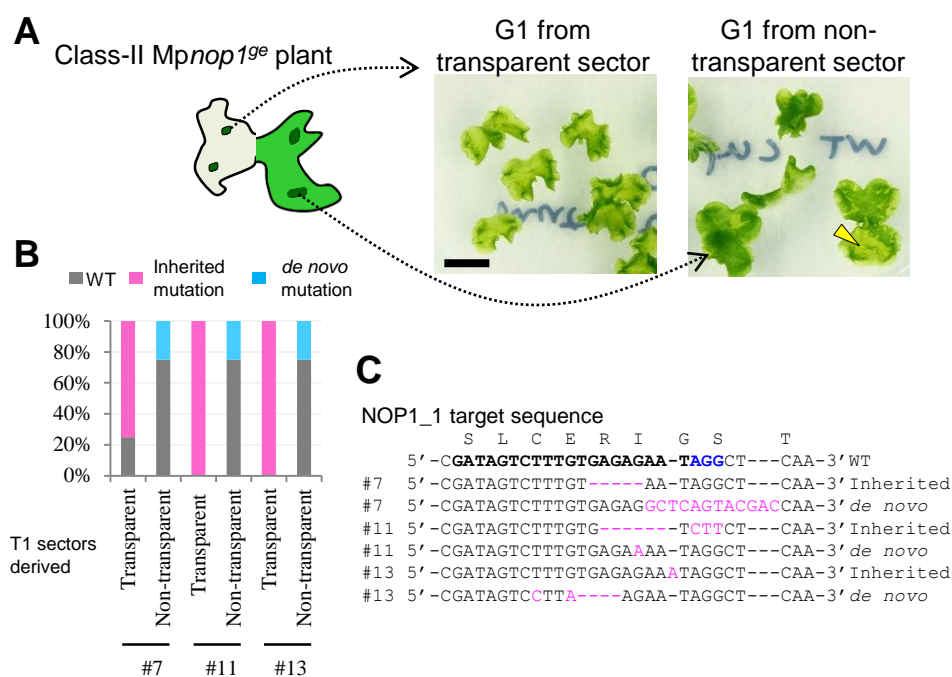

Figure 5.

Shigeo S. Sugano, Ryuichi Nishihama, Makoto Shirakawa, Junpei Takagi, Yoriko Matsuda, Sakiko Ishida, Tomoo Shimada, Ikuko Hara-Nishimura, Keishi Osakabe, and Takayuki Kohchi

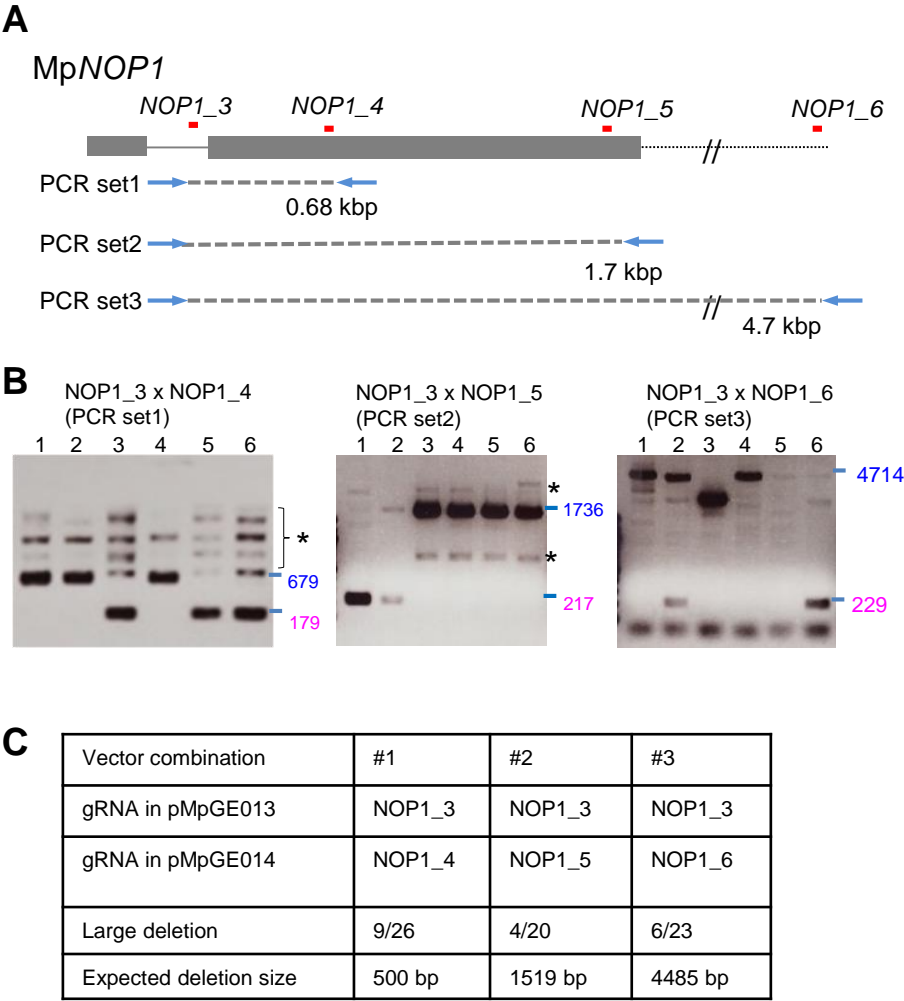

Figure 6.

Shigeo S. Sugano, Ryuichi Nishihama, Makoto Shirakawa, Junpei Takagi, Yoriko Matsuda, Sakiko Ishida, Tomoo Shimada, Ikuko Hara-Nishimura, Keishi Osakabe, and Takayuki Kohchi

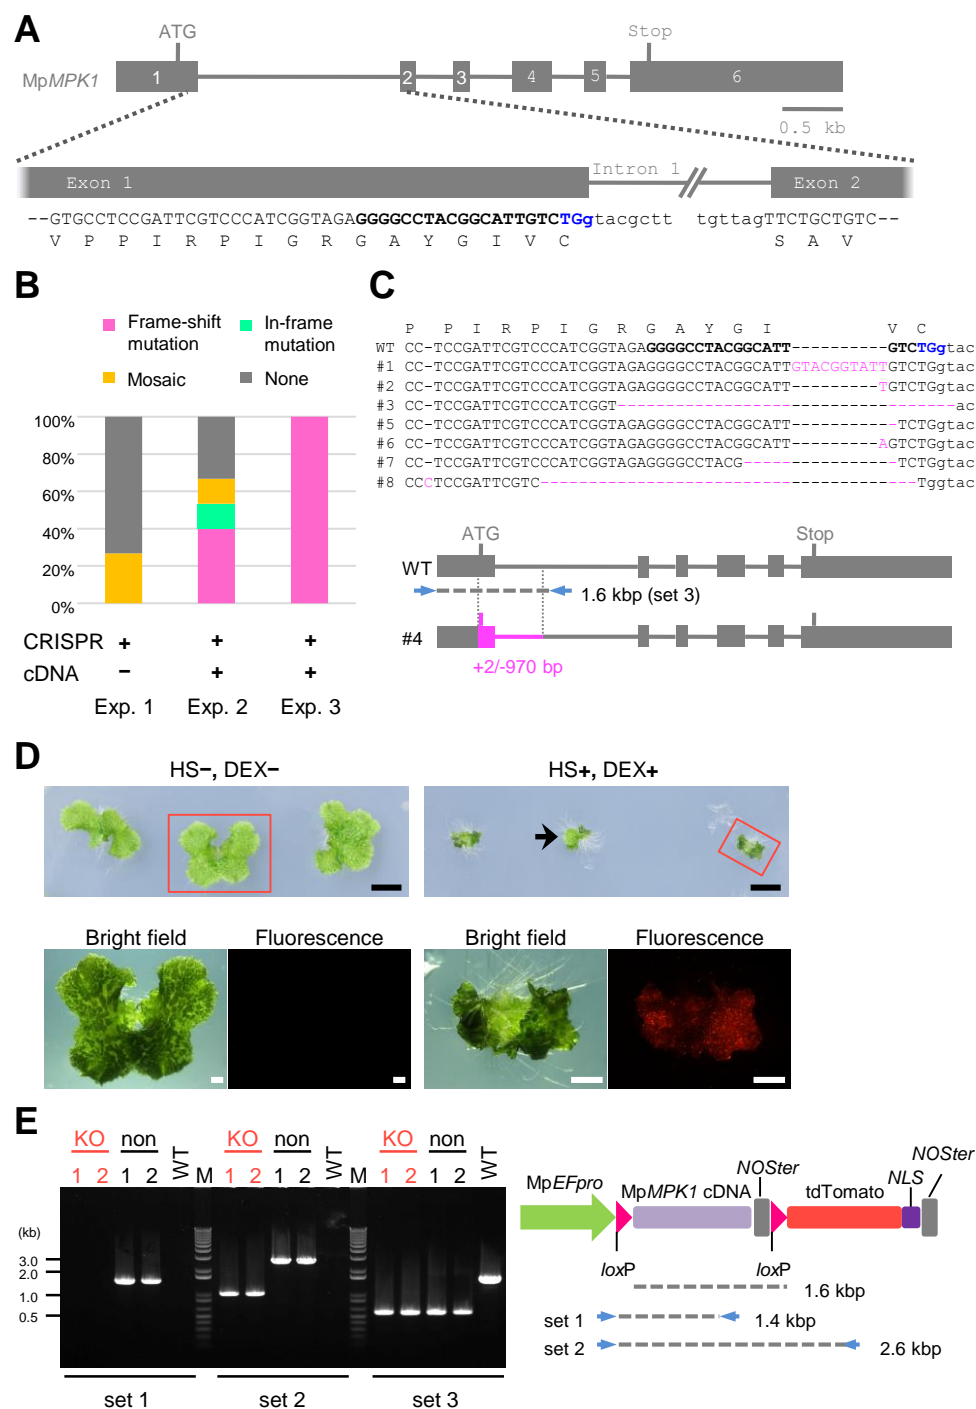

Figure 7.

Shigeo S. Sugano, Ryuichi Nishihama, Makoto Shirakawa, Junpei Takagi, Yoriko Matsuda, Sakiko Ishida, Tomoo Shimada, Ikuko Hara-Nishimura, Keishi Osakabe, and Takayuki Kohchi

## A pMpGE\_En01

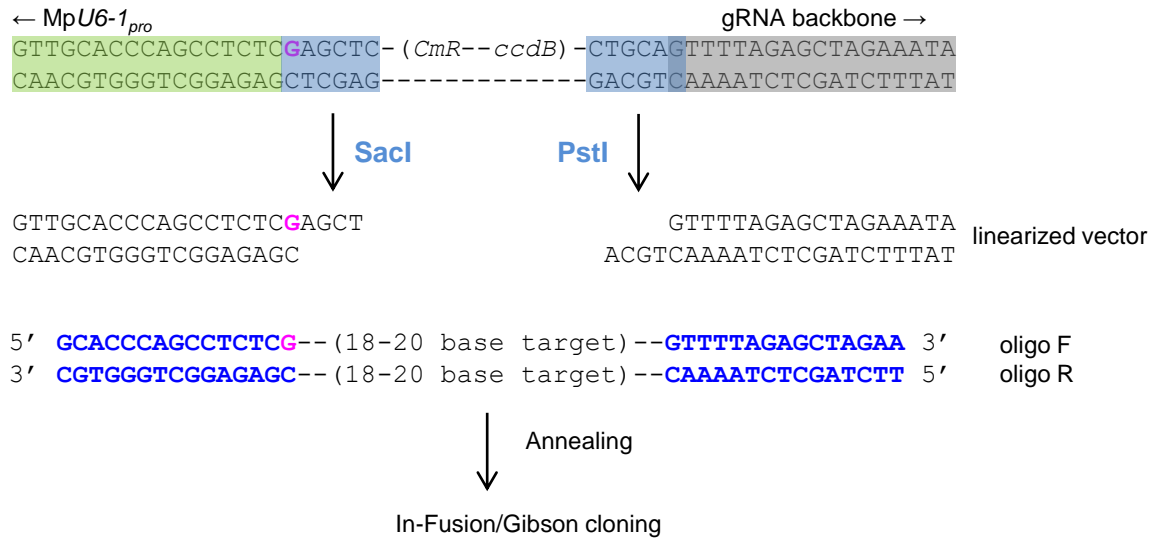

## B pMpGE\_En02/03

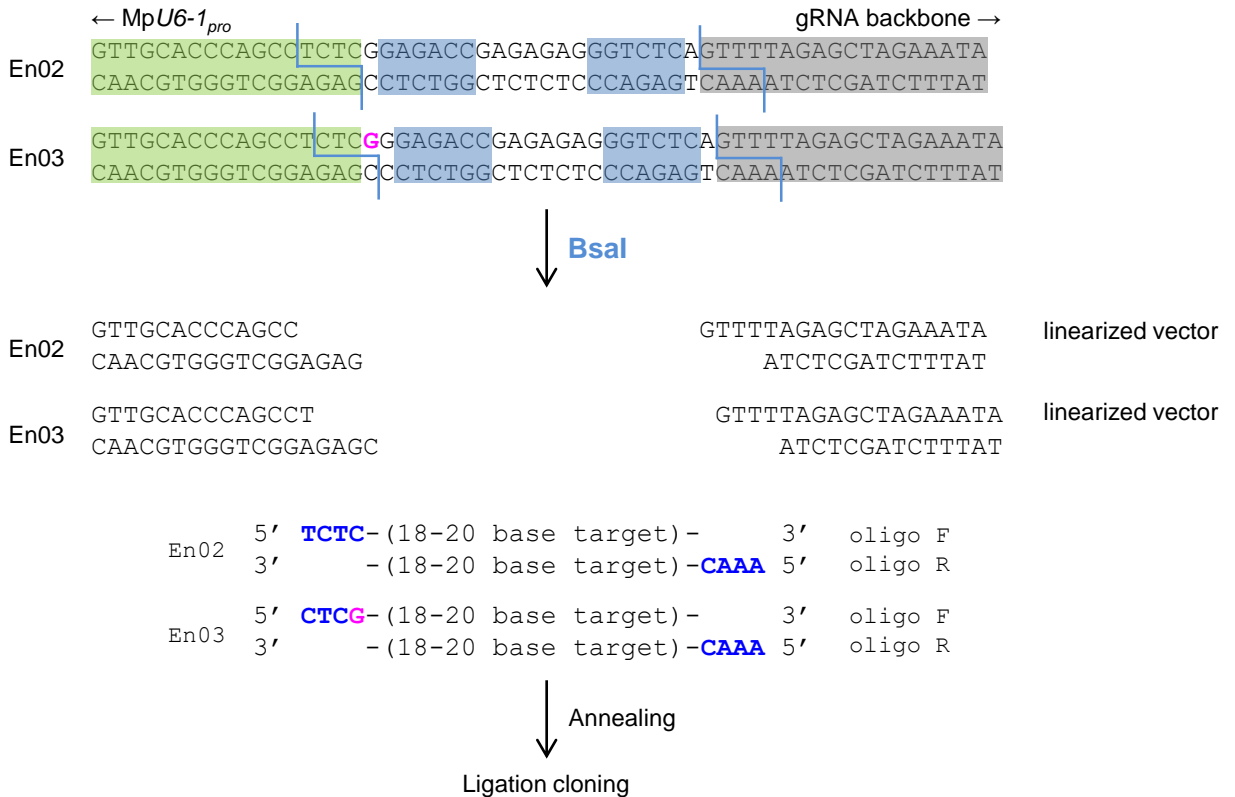

**Figure S1. Protocols for gRNA cloning in entry vectors.**

(A) pMpGE\_En01 is designed to use the In-Fusion/Gibson cloning methods. pMpGE\_En01 is digested by *SacI* and *PstI*. Two entirely complementary oligo DNAs, which contain at both ends the 15-bp sequences identical to each end of the digested vector and a guide sequence without PAM sequence in between, are annealed and cloned by use the In-Fusion/Gibson reaction. The sense strand of gRNAs should be coded in oligo F. The ‘extra initial G’ is colored in magenta.

(B) pMpGE\_En02/03 are designed to use ligation reactions. pMpGE\_En02 or pMpGE\_En03 is digested by *BsaI*, which digests outside of its recognition sites. Oligo F, which contains a sense-strand guide sequence with TCTC at its 5’ end, and oligo R, which contains the reverse-complement guide sequence with AAAC at its 5’ end, are annealed and cloned by ligation reaction to pMpGE\_En02. pMpGE\_En02 does not contain an ‘extra initial G’ and thus requires G or A in the first nucleotide position of a guide sequence for efficient expression. In case of pMpGE\_En03, the ‘extra initial G’ exists in the vector. Therefore, oligo F should contain a sense-strand guide sequence with CTCG at its 5’ end for the construction of pMpGE\_En03.



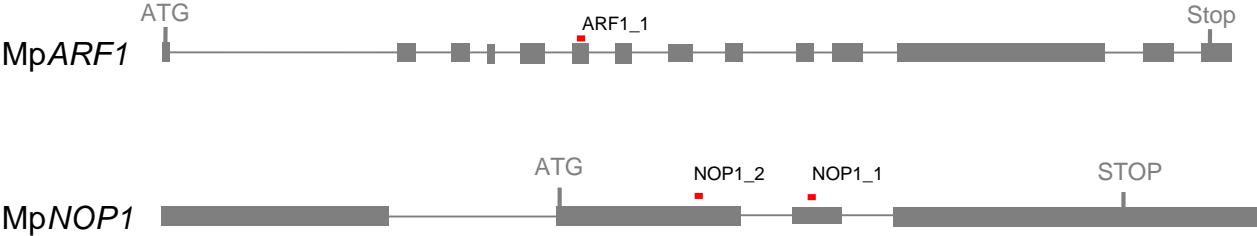

**Figure S2. Gene structures of *MpARF1* and *MpNOP1*.**  
Target sites of the gRNAs used are shown as red lines. Boxes and lines show exons and introns, respectively. “ATG” and “Stop” denote the predicated initiation and termination codons.

hCas9

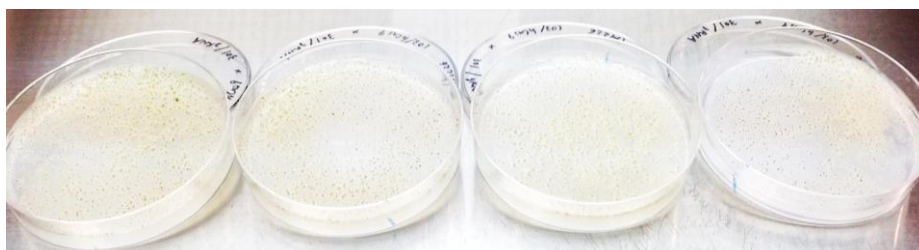

Atco-Cas9

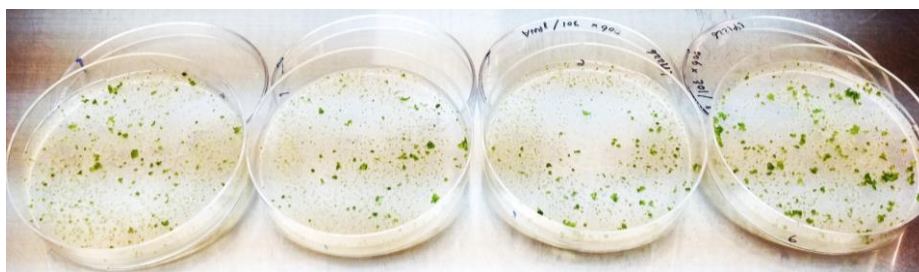

10  $\mu$ M NAA, 3 weeks

**Figure S3. Comparison between *hCas9* and *Atco-Cas9* for genome editing efficiency.**

The same *MpARF1*-targeting gRNA expression vector (pMpGWB301\_ARF1\_1) was introduced into sporelings together with either hCas9 expression vector (pMpGWB103-hCas9; top) or Atco-Cas9 expression vector (pMpGE006; bottom) and selected on media containing 10  $\mu$ M NAA for three weeks. Mutations in the *MpARF1* gene are known to cause NAA resistance.

**A**

pMpGE011\_ARF1\_1 using pMpGE\_En01 (28/32)

H P A Q E L V A R D L H D Q E W H F R  
5' -CATCCTGCCCAGGAGCTTGTGCGCAAGAGACCTTCATGATCA--GGAGTGGCACTTCCGG-3' (WT)  
5' -CATCCTGCCCAGGAGCTTGTGCGCAAGAGACCTTCAT-----GAGTGGCACTTCCGG-3' x2  
5' -CATCCTGCCCAGGAGCTTGTGCGCAAGAGACCTTCATGAT-----GAGTGGCACTTCCGG-3' x2  
5' -CATCCTGCCCAGGAGCTTGTGCGCAAGAGACCTTCATGATCA GTGGAGTGGCACTTCCGG-3'  
5' -CATCCTGCCCAGGAGCTTGTGCGCAAGAGACCTTCATGATC-----TGGCACTTCCGG-3'  
5' -CATCCTGCCCAGGAGCTTGTGCGCAAGT GACCTTCATGATC G--TGAGTGGCACTTCCGG-3'  
5' -CATCCTGCCCAGGAGCTTGTGCGCAAGAGACCTTCATGAT G A--GGAGTGGCACTTCCGG-3' x2  
5' -CATCCTGCCCAGGAGCTTGTGCGCAAGAGACCTTCATGATCA--TGAGTGGCACTTCCGG-3' x8  
5' -CATCCTGCCCAGGAGCTTGTGCGCAAGAGACCTTCATGATCA--GAGTGGCACTTCCGG-3'  
5' -CATCCTGCCCAGGAGCTTGTGCGCAAGAGACCTTCATGATC T--TGAGTGGCACTTCCGG-3'  
5' -CATCCTGCCCAGGAGCTTGTGCGCAAGAGACCTTCATGAT-----CACTTCCGG-3'  
Indels larger than 20 bp x 2  
Mosaic x 6

**B**

pMpGE010\_NOP1\_1 using pMpGE\_En02 (12/16)

E L S K S D S L C E R I G S T N G A  
5' -GAGCTCTCGAAATCCGATAGTCTTTGTGAGAG-----AATAGGCTCAACAAACGGAGCTA-3' (WT)  
5' -GAGCTCTCGAAATCCGATAGTCTTTGTGAGAG-----CTAGGCTCAACAAACGGAGCTA-3'  
5' -GAGCTCTCGAAATCCGATAGTCTTTGTGAGAG GCTCAACAATAGGCTCAACAAACGGAGCTA-3'  
5' -GAGCTCTCGAAATCCGATAGTCTTTGTGA-----TAGGCTCAACAAACGGAGCTA-3'  
5' -GAGCTCTCGAAATCCGATAGTCTTTGTGA A-----TAGGCTCAACAAACGGAGCTA-3'  
5' -GAGCTCTCGAAATCCGATAGTCTTTGTGA-----GAGGCTCAACAAACGGAGCTA-3'  
5' -GAGCTCTCGAAATCCGATAGTCTTTGTGA-----GAGCTA-3'  
5' -GAGCTCTCGAAATCCGATAGTCTTTGTGAGAG-----AATAGGCTCAACAAACGGAGCTA-3' x4  
Indels larger than 20 bp x 4  
Mosaic x 2

**Figure S4. Genome editing with different vector combinations.**

(A) MpARF1-targeted mutagenesis with pMpGE011 containing the *gRNA* expression cassette for ARF1\_1 derived from pMpGE\_En01.

(B) MpNOP1-targeted mutagenesis with MpGE010 containing the *gRNA* expression cassette for NOP1\_1 derived from pMpGE\_En02.

Inserted or substituted bases are colored in magenta. The target guide sequences are shown in bold face with their PAM sequences in blue.

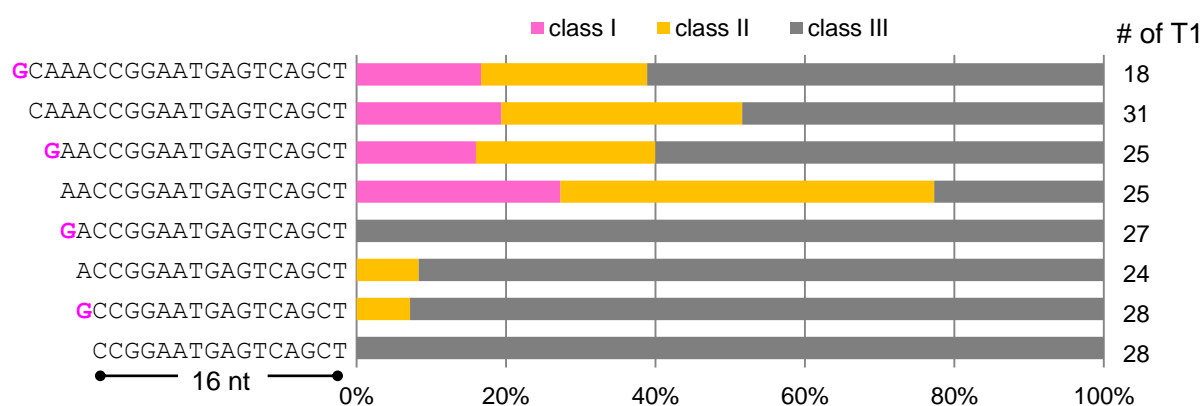

**Figure S5. Effects of addition of an 'extra initial G'.**

Proportions of mutant phenotype classes (see Fig. 4) in T1 plants transformed with *MpNOP1*-targeting gRNAs (NOP1\_2) of the indicated lengths with or without the 'extra initial G' (magenta). The numbers of T1 plants inspected are shown on the right side of the graph.

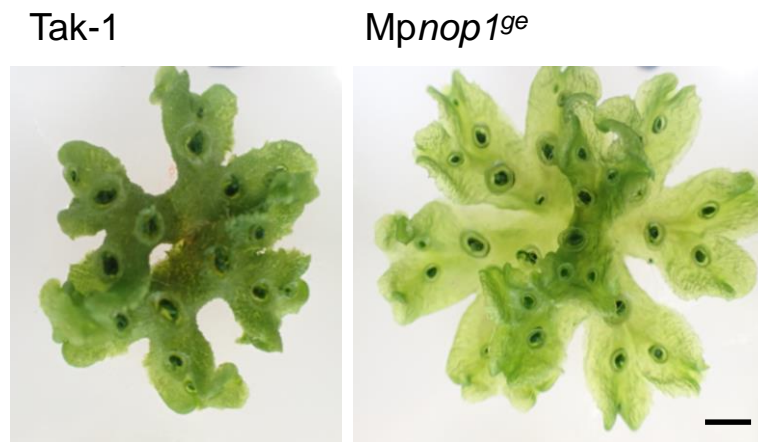

**Figure S6. Representative photo of *Mpnop1<sup>ge</sup>* mutant which harbors 4.5 kbp large deletion**

Photos of Tak-1 control plant (Left) and the double transformant, which pMpGE013 with NOP1\_3 gRNA and pMpGE014 with NOP1\_6 gRNA were transfected (Right). Scale bar = 2 mm.

**A**

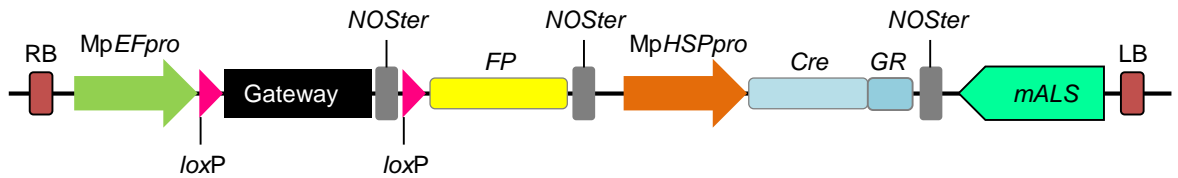

**B**

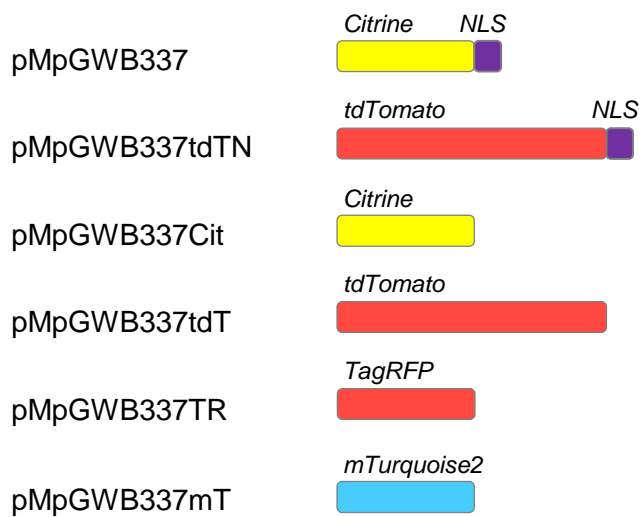

**Figure S7. Derivatives of pMpGWB337 with various fluorescent protein markers.**

(A) Structure of pMpGWB337 derivatives. Genes for complementation (either cDNA or genomic fragment) can be expressed under the control of *MpEF<sub>pro</sub>* by introduction into the Gateway cassette and deleted in plants by heat shock and DEX treatment by virtue of the cassette expressing Cre recombinase fused to the rat glucocorticoid receptor domain (GR) under the control of the *MpHSP17.8A1* promoter [23]. FP, fluorescent protein coding sequence.

(B) List of fluorescent protein sequences in pMpGWB337 derivatives. NLS, nuclear localization signal.

**A**

|             |                                                                               |
|-------------|-------------------------------------------------------------------------------|
| gRNA_ARF1_1 | 5'-----CGCAAGAGACCTTCATGATCAG-----GAGTGGCA-----3'                             |
| #13         | 5'-GCCCAGGAGCTTGTGCGCAAGAGACCTTCATGATGAGCTTGTGCGCATGAGACCTTCAAGTGGCACTTCCG-3' |
| ARF1 genome | 5'-GCCCAGGAGCTTGTGCGCAAGAGACCTTCATGATCAG-----GAGTGGCACTTCCG-3'                |
| Insertion   | 5'-----GAGCTTGTGCGCATGAGACCTTCA-----3'                                        |

**B**

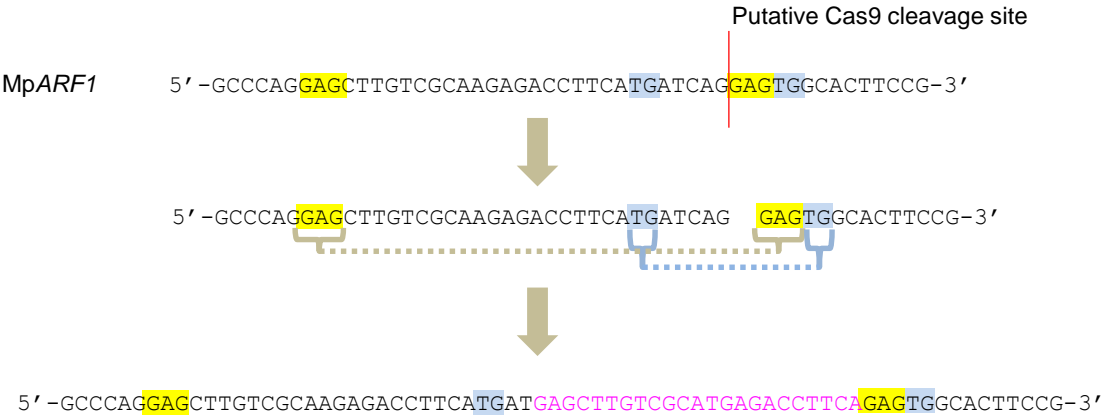

**Figure S8. One of the example of microhomology-based repair in *M. polymorpha*.**

(A) Alignment of gDNA sequence of #13. Microhomology was highlighted with yellow and blue. (B) Schematic putative repair pathway in the mutant # 13 in pMpGE011\_ARF1\_1. The sequence was the same as Fig. S4

**Supplementary Table S1. Oligos used in this study**

| Purpose                             | Name                    | Sequence                                                | Related figures |
|-------------------------------------|-------------------------|---------------------------------------------------------|-----------------|
| Atco-Cas9 cloning                   | cacc_AtCas9_F           | 5'-CACCATGGATAAGAAGTACTCTATCGG-3'                       | Fig. 1          |
| Atco-Cas9 cloning                   | Pea3Ter_R               | 5'-AAGCCTATACTGTACTTAACCTTGATT-3'                       |                 |
| Gateway cloning site amplification  | Infusion_GW_A51_F       | 5'-GTGGTTGATAACAGCGGTTGACTAGAGTTATCA-3'                 | Fig. 2          |
| Gateway cloning site amplification  | Infusion_GW_A51_R       | 5'-ATTCGAGCTCTAAGCCTCTAAGCGCTGTTATCA-3'                 |                 |
| MpU6-1 cloning                      | Mp-U6_38003_F           | 5'-CACCTATTCTATCAAAGAGATTTTTAAAGATC-3'                  |                 |
| MpU6-1 cloning                      | Mp-U6_38003_R           | 5'-GAGAGGCTGGGTGCAAC-3'                                 |                 |
| ccdB site amplification             | OE-MpU6-CmRccdB-F2      | 5'-GCAGAGTTGCACCCAGCCTCTCgagctcATTAGGCACCCAGGCTTT-3'    |                 |
| ccdB site amplification             | gRNA-R3                 | 5'-tagAAAAAAGCACCAGCTCGGTG-3'                           |                 |
| pMpGE_En02 construction             | Bsal-Sp-sgRNA_F         | 5'-GACCGAGAGAGGGTCTCAGTTTTAGAGCTAGAAAT-3'               |                 |
| pMpGE_En02 construction             | gRNA_R                  | 5'- GTGGCACCAGTCGGTGCTTTTTTCTCA-3'                      |                 |
| pMpGE_En02 construction             | MpU6-1_500_F            | 5'-GTAACGTGAGACTACTAC-3'                                |                 |
| pMpGE_En02 construction             | Bsal_MpU6_1R            | 5'-GACCCTCTCTCGGTCTCCGAGAGGCTGGGTGCAAC-3'               |                 |
| pMpGE_En03 construction             | Mp_oligo6Bsal_Gf        | 5'-TCTCGGGAGACCGAGAGAGGGTCTCA-3'                        |                 |
| pMpGE_En03 construction             | Mp_oligo6Bsal_Gr        | 5'-AAACTGAGACCTCTCTCGGTCTCCC-3'                         |                 |
| pMpGE013 construction               | Mp_oligo5Aarl_Gf        | 5'-TCTCGAAATGAGGTGATGACTCACCTGCATAA-3'                  |                 |
| pMpGE014 construction               | Mp_oligo5Aarl_Gr        | 5'-AAACTTATGAGGTGAGTCATCACCTGCATTTC-3'                  |                 |
| ARF1_1 gRNA                         | ARF1_sgRNA_F            | 5'-GCACCCAGCCTCTCGAGACCTTCATGATCAGGAGGTTTTAGAGCTAGAA-3' | Figs. 3, S4     |
|                                     | ARF1_sgRNA_R            | 5'-TTCTAGCTCTAAACCTCTGATCATGAAGTCTCGAGAGGCTGGGTGC-3'    |                 |
| NOPI_1 gRNA for pMpGE_En01          | NOPI_1sgRNA_F           | 5'-GCACCCAGCCTCTCGATAGTCTTTGTGAGAGAATGTTTTAGAGCTAGAA-3' | Fig. 3          |
|                                     | NOPI_1sgRNA_R           | 5'-TTCTAGCTCTAAACATTCTCTCACAAGACTATCGAGAGGCTGGGTGC-3'   |                 |
| NOPI_1 gRNA for pMpGE_En02          | Mp_oligo2_F             | 5'-TCTCGATAGTCTTTGTGAGAGAAT-3'                          | Fig. S4         |
|                                     | Mp_oligo2_R             | 5'-AAACATTCTCTCACAAGACTATC-3'                           |                 |
| MpARF1 genotyping                   | ARF1_Seq_F3             | 5'-GCCGATGTGCATATACCCAGCTATCCCACT-3'                    | Figs. 1, 3      |
|                                     | ARF1_Seq_R3             | 5'-ATGTTATATCCTCGGTTGATTCTCGTACGA-3'                    |                 |
| MpNOPI1 genotyping                  | CRISPR_NOPI1_F          | 5'-ATGGAGCAAGTGCAGTTGAGGGCTCTCG-3'                      | Figs. 1, 3      |
|                                     | CRISPR_NOPI1_R          | 5'-CGTGAGGTGACGATGCCAGTCCGACCAG-3'                      |                 |
| MpARF1 off targets genotyping_OT1   | ARF1_1_OT1_F2           | 5'-CAAAACAATGACAGGTGAACAGCG-3'                          | Table 1         |
|                                     | ARF1_1_OT1_R2           | 5'-CTTCAATGAGCGTTAGTGCAGC-3'                            |                 |
| MpARF1 off targets genotyping_OT2   | ARF1_1_OT2_F            | 5'-TCTCGTGACTCGATCAAGATGGG-3'                           |                 |
|                                     | ARF1_1_OT2_R            | 5'-TTCACTCCCTCGGCATGGTTTC-3'                            |                 |
| MpARF1 off targets genotyping_OT3   | ARF1_1_OT3_F            | 5'-CATCCACTCCAGCTGTACCATC-3'                            |                 |
|                                     | ARF1_1_OT3_R            | 5'-TCCATGGGCCCTTAGATTAGGAGG-3'                          |                 |
| MpNOPI1 off targets genotyping_OT1  | NOPI_1_OT1_F            | 5'-CTCAACCATTGAACAGCGTCGG-3'                            | Table 1         |
|                                     | NOPI_1_OT1_R            | 5'-TTTGTCCAGTTAGGCTGCTCATC-3'                           |                 |
| MpNOPI1 off targets genotyping_OT2  | NOPI_1_OT2_F            | 5'-TCGGGGCCTGCTCATCGGGCTCC-3'                           |                 |
|                                     | NOPI_1_OT2_R            | 5'-GCTCAAGCTATGCCGAGGTCGTC-3'                           |                 |
| MpNOPI1 off targets genotyping_OT3  | NOPI_1_OT3_F            | 5'-TGGATTGCGCGCTCCTCGTTC-3'                             |                 |
|                                     | NOPI_1_OT3_R            | 5'-TATTGGAATCGGCAGGACCGCGG-3'                           |                 |
| gRNA length assessment              | NOPI-2_20ntF            | 5'-tctcAAACCGGAATGAGTCAGCT-3'                           | Figs. 4, 5, S5  |
|                                     | NOPI-2_20ntR            | 5'-aaacAGCTGACTCATTCCGGTTTG-3'                          |                 |
|                                     | NOPI-2_19ntF            | 5'-tctcAAACCGGAATGAGTCAGCT-3'                           |                 |
|                                     | NOPI-2_19ntR            | 5'-aaacAGCTGACTCATTCCGGTTT-3'                           |                 |
|                                     | NOPI-2_18ntF            | 5'-tctcAACCAGGAATGAGTCAGCT-3'                           |                 |
|                                     | NOPI-2_18ntR            | 5'-aaacAGCTGACTCATTCCGGTT-3'                            |                 |
|                                     | NOPI-2_17ntF            | 5'-tctcAACCAGGAATGAGTCAGCT-3'                           |                 |
|                                     | NOPI-2_17ntR            | 5'-aaacAGCTGACTCATTCCGGT-3'                             |                 |
|                                     | NOPI-2_16ntF            | 5'-tctcCCGGAATGAGTCAGCT-3'                              |                 |
|                                     | NOPI-2_16ntR            | 5'-aaacAGCTGACTCATTCCGG-3'                              |                 |
| For addition of extra initial G     | NOPI-2_20ntFg           | 5'-ctcgCAACCGGAATGAGTCAGCT-3'                           |                 |
|                                     | NOPI-2_19ntFg           | 5'-ctcgAAACCGGAATGAGTCAGCT-3'                           |                 |
|                                     | NOPI-2_18ntFg           | 5'-ctcgAACCAGGAATGAGTCAGCT-3'                           |                 |
|                                     | NOPI-2_17ntFg           | 5'-ctcgAACCAGGAATGAGTCAGCT-3'                           |                 |
|                                     | NOPI-2_16ntFg           | 5'-ctcgCCGGAATGAGTCAGCT-3'                              |                 |
| Larger deletion analysis genotyping | NOPI_05_F               | 5'-CCTCATGGATTTTATCGC-3'                                | Figs. 6, S6     |
|                                     | NOPI_1k_R               | 5'-ACGATGGCACCAGCACT-3'                                 |                 |
|                                     | NOPI_2k_R               | 5'-TCCGACCTTTTGAACAC-3'                                 |                 |
|                                     | NOPI_5k_R               | 5'-CCAACAATATTCAGCGAC-3'                                |                 |
| For ds oligo DNA                    | NOPI_3_F                | 5'-CTCGATTAAGAGTGGAAGTTGCTT-3'                          |                 |
|                                     | NOPI_3_R                | 5'-AAACAAGCAACTTCCACTCTTAAT-3'                          |                 |
|                                     | NOPI_4_F                | 5'-CTCGAGCTTCTCCAAGTTCTGGTC-3'                          |                 |
|                                     | NOPI_4_R                | 5'-AAACGACCAGAAGTTGAGAGAAGCT-3'                         |                 |
|                                     | NOPI_5_F                | 5'-CTCGCACGTTTACACGCGCATGGT-3'                          |                 |
|                                     | NOPI_5_R                | 5'-AAACACCATGGCCGTGTGAACGTG-3'                          |                 |
|                                     | NOPI_6_F                | 5'-CTCGGAAGATCAAGCATGAATCAA-3'                          |                 |
|                                     | NOPI_6_R                | 5'-AAACTTGATTCATGCTTGATCTTC-3'                          |                 |
| MpMPK1 gRNA                         | sgRNA_Bsa_MpMPK1_ex1t_F | 5'-tctcGGGGCCTACGGCATTGTGTC-3'                          | Fig. 7          |
| MpMPK1 gRNA                         | sgRNA_Bsa_MpMPK1_ex1t_R | 5'-aaacGACAATGCCGTAGGCCCC-3'                            |                 |
| MpMPK1 CRISPR genotyping and set 3  | MpMPK1_-549F            | 5'-GGTCAACGACCCCTTGACAGC-3'                             |                 |
| MpMPK1 CRISPR genotyping            | MpMPK1_g540R            | 5'-CCAAAGTAGAGGCCATGCATGTG-3'                           |                 |
| MpMPK1 cDNA                         | MpMPK1_1F_TOPO          | 5'-caccATGGATTCCGCGAGCAGCTGCCG-3'                       |                 |
| MpMPK1 cDNA and set 1               | MpMPK1_c1131R_STP       | 5'-CTATTGCATCATGTCTGGTAGGGG-3'                          |                 |
| Sets 1 and 2                        | MpEF-P_seqL1            | 5'-CCCACCTTTGGTCAGTCCTGT-3'                             |                 |
| Set 2                               | tdTomato_753R           | 5'-GATGACGGCCATGTTGTTG-3'                               |                 |
| Set 3                               | MpMPK1_g1010R           | 5'-CGAGACATCAGGGACACGGAAG-3'                            |                 |
| For pMpGWB337 series                | ccdB_236F               | 5'-AAGTGGCTGATCTCAGCCACC-3'                             | Fig. S7         |
|                                     | loxP_NruI_Sac_R         | 5'-TTTCAGGCTCTTTCGCGATAAATTCGTATAATGTATGC-3'            |                 |
|                                     | NOST_head_R_SacI        | 5'-CAGCATGAGCGAGCTGATTAAG-3'                            |                 |
|                                     | mCherry_CAGC_F          | 5'-GATCGGGGAAATTCGAGCTC-3'                              |                 |
|                                     | mTurq_CAGC_F            | 5'-CAGCATGGTGAGCAAGGGCG-3'                              |                 |
|                                     | TagRFP_CAGC_F           | 5'-CAGCATGGTGAGCAAGGGCGAGG-3'                           |                 |
|                                     | tdTomato_CAGC_F         | 5'-CAGCATGGTGCTAAGGGTGAGGAAC-3'                         |                 |
|                                     | pUGW_Aor_mTurq_IF_F     | 5'-GTGGTTGATAACAGCATGGTGTCTAAGGGTGAGGAAC-3'             |                 |
|                                     | pUGW_Aor_mTurq_Stp_IF_R | 5'-ATTCGAGCTCTAAGCCTATTGTGTAAGGCTCATCCATTCCG-3'         |                 |
